# Supplementary material for: A meta-analysis of genome-wide association studies identifies 17 new Parkinson's disease risk loci
Source: Springer Nature journal article supplement (doi:10.1038/ng.3955), 2017-09-11
Supplement: 41588_2017_BFng3955_MOESM1_ESM.pdf [file 41588_2017_BFng3955_MOESM1_ESM.pdf]

## **SUPPLEMENTARY INFORMATION**

**A meta-analysis of genome-wide association studies identifies  
17 new Parkinson's disease risk loci**

## SUPPLEMENTARY NOTE

### Enrichment of PDGene associations in PDWBS data

Top associations in PDGene were tested for enrichment of smaller p-values in the PDWBS data. All variants (of the 9,830 top PDGene variants) within 1Mb of previously associated loci were removed, and the remaining SNPs were LD-pruned with an  $r^2$  threshold of 0.01 (using 1000 Genomes data for reference LD information). After the previous filtering step, 448 SNPs remained. Enrichment of variants observed at each significance threshold in the PDWBS data was tested in the remaining SNPs using a chi-square test. Results are shown in Supplementary Table 3. We observe significant enrichment of smaller p-values in the top PDGene associations in the PDWBS data.

### Power calculations for phenotyped versus population controls

The self-reported samples used as controls could result in a reduction of power in PDWBS. We investigated whether sample misdiagnosis or the presence of samples that may develop Parkinson's in the future within controls led to a reduction in power. Assuming that the misdiagnosis rate is unlikely to exceed the population prevalence of PD, we modified the method for computing power of a GWAS (CaTs)[1] by adjusting the controls disease allele frequency to account for misdiagnosis (based on prevalence) using the equation:

$$control_{adj}DAF = controlDAF * (1 - prevalence) + caseDAF * (prevalence)$$

where *caseDAF* and *controlDAF* are unchanged from the original CaTs calculation.

We compared the unadjusted power calculation ("*phenotyped controls*") to the power calculation adjusted for a misdiagnosis rate equal to the population prevalence of PD (0.01) ("*population controls*"). Assuming a significance threshold  $\alpha = 5 \times 10^{-8}$  and genotype relative risk of 1.1, we observe minimal loss in power (see plot below). For example, at a disease allele frequency of 0.3, misdiagnosis of controls decreased the power from 0.397 to 0.378. Increasing the population prevalence of PD to 0.02 did not substantially decrease power (see below). Given these power calculations, we conclude that the use of self-reported controls has a modest impact on the power to detect effects within PDWBS.

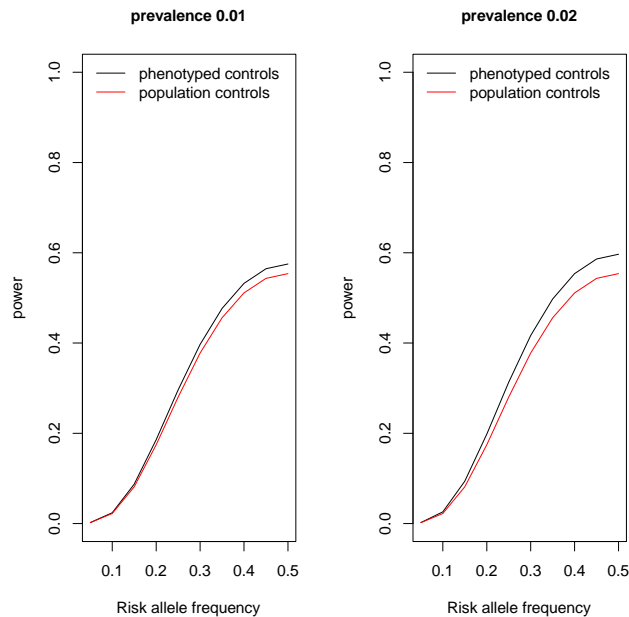

## PD genetic risk score

We calculated genetic risk scores (GRS) as described in previous studies to test whether the new PD risk loci significantly improved the GRS[2-4]. The GRS for previous loci used the 28 previously replicated GWAS variants (the 24 genome-wide significant loci in Table 1 in the main text, and four secondary signals in the *GBA*, *TMEM175*, *SNCA* and *HLA-DQB1* locus [3]) with the addition of rarer variants N370S and E326K in the *GBA* gene and G2019S in *LRRK2*[5] (Bras *et al* under review) (31 total variants). We compared this to a GRS calculated with an additional 16 novel loci present in the NeuroX data (see Table 2 in main text) (47 total variants). All GRS analyses were weighted using combined discovery effect estimates applied to the NeuroX allele counts, adjusting for age (onset in cases or last exam in controls), sex and eigenvectors 1-5 within a logistic regression model. Comparing areas under the curve of logistic regression models, we see a slight but significant increase in classification accuracy from the 31 variant GRS (AUC = 0.6439, 95% CI: 0.634-0.6537) to the 47 variant GRS (AUC = 0.6518, 95% CI: 0.6419-0.6616) quantified by DeLong's test ( $|Z| = 5.4187$ ,  $P = 6.002 \times 10^{-8}$ )[6]. A significant increase in accuracy was still observed if we removed the three loci that did not validate at a one-sided  $P < 0.05$  in the NeuroX dataset ( $|Z| = 5.342$ ,  $P = 9.192 \times 10^{-8}$ ). While slightly higher AUC was detected in the 47 variant GRS than in the 44 variant GRS (AUC = 0.6515, 95% CI: 0.6417-0.6614), the increase in AUC was not significant ( $P > 0.05$ ).

## Differential expression between PD and healthy controls

Total RNA was extracted from the striatum and frontal cortex of subjects with a histopathological diagnosis of Parkinson's disease and aged matched healthy controls for sequencing. 0.5 µg of total RNA was used as an input material for library preparation using TruSeq RNA Sample Preparation Kit v2 (Illumina). Size of the libraries was confirmed using Fragment Analyzer (Advanced Analytical Technologies).

Library concentrations were determined by a qPCR-based method using a library quantification kit (KAPA). The libraries were multiplexed and then sequenced on Illumina HiSeq2500 to generate 25 million single-end 50-base reads per library. HTSeqGenie was used to perform feature counting, filtering & alignment. Only reads with unique genomic alignments were analyzed. Reads with alignments overlapping exons of the gene model were counted towards that gene. Gene models used in this step were from the IGIS gene model package on Bioconductor (TxDb.Hsapiens.BioMart.igis).

Genes with mean expression across all samples and tissues < 2 RPKM were removed. Differential expression between Parkinson's patients and healthy controls was assessed separately in the frontal cortex and in the striatum tissue. Differential expression was tested with DESeq2 [7]. Genes with an adjusted p-value < 0.05 in either tissue were considered as suggestive of differential expression. Because gene expression is derived from bulk tissue, it is equally possible that differential expression between the two disease states is due to differential cell-type composition of the tissue sample. Without expression data at cell-level resolution it is difficult to distinguish between a scenario with differential cell-type composition, differential gene expression or a mixture of the two. We therefore acknowledge that significant genes in our differential expression analysis are merely suggestive of differential gene expression between disease states.

## Colocalization of eQTL and PD-associations

Colocalization is a formal way to test for overlap between the causal variant underlying a GWAS association and an eQTL association. One method typically used to carry this out on summary statistics is encoded by the R package, *coloc*[8]. Applying this method to GWAS and eQTL data requires making some key assumptions, including the assumption of a single causal variant and that the causal variant is included in the input summary statistics (see Giambortolomei *et al.* 2013 for a more detailed discussion). As the meta-analysis was carried out on a subset of SNPs provided publicly by PDGene, we did not have dense genotyping of variants in the PD-associated loci with summary statistics from the meta-analysis. Thus, we could not carry out a full colocalization analysis on all of the PD-associated loci discussed in this study.

As an alternative, we carried out colocalization only on the PDWBS dataset at the previously reported PD-loci that were genome-wide significant in the PDWBS cohort alone and for which we report an eQTL (7 SNP-gene pairings, see below). Colocalization between causal variants in PD associated loci and eQTLs was carried out with the *coloc.abf* function in the *coloc* R package[8] with prior probabilities  $p1$  and  $p2$  parameters set to  $1 \times 10^{-5}$ . eQTL summary statistics as pre-computed by GTEx and summary statistics from PDWBS were used as input for *coloc*. The colocalization analysis was run on all SNPs within 250kb of the index SNP that overlapped both the GTEx and the PDWBS GWAS data for each PD-associated locus. Of the eQTLs report, we find that all have moderate to high evidence of colocalization (posterior probability > 0.5).

| SNP        | Gene           | GTEx tissue                          | Posterior probability of shared causal variant |
|------------|----------------|--------------------------------------|------------------------------------------------|
| rs11060180 | <i>OGFOD2</i>  | Brain_Anterior_cingulate_cortex_BA24 | 0.523                                          |
| rs12637471 | <i>MCCC1</i>   | Muscle_Skeletal                      | 0.554                                          |
| rs1474055  | <i>STK39</i>   | Brain_Putamen_basal_ganglia          | 0.593                                          |
| rs1474055  | <i>STK39</i>   | Testis                               | 0.578                                          |
| rs34311866 | <i>DGKQ</i>    | Brain_Cerebellum                     | 0.514                                          |
| rs34311866 | <i>DGKQ</i>    | Lung                                 | 0.858                                          |
| rs356182   | <i>SNCA</i>    | Brain_Cerebellar_Hemisphere          | 0.548                                          |
| rs823118   | <i>NUCKS1</i>  | Brain_Caudate_basal_ganglia          | 0.63                                           |
| rs823118   | <i>NUCKS1</i>  | Skin_Sun_Exposed_Lower_leg           | 0.929                                          |
| rs823118   | <i>SLC41A1</i> | Brain_Cerebellum                     | 0.521                                          |
| rs823118   | <i>SLC41A1</i> | Pancreas                             | 0.626                                          |

### Gene sets used for targeted gene-set enrichment analyses

Lysosomal, autophagy and mitochondrial gene-sets mapping to the background list of genes (see Methods section in the main paper) are listed below.

#### Lysosomal genes

*ABCA2, ABCA3, ABCB9, ABCC10, ACP2, ACP5, ACPP, AGA, AHNAK, ANKFY1, ANPEP, AP1G1, AP3B1, AP3D1, AP3M1, ARL8A, ARL8B, ARSA, ARSB, ARSG, ASAH1, ATP11A, ATP11C, ATP13A2, ATP6AP1, ATP6V0A1, ATP6V0A2, ATP6V0A4, ATP6V0C, ATP6V0D1, ATP6V1A, ATP6V1B1, ATP6V1B2, ATP6V1C1, ATP6V1C2, ATP6V1D, ATP6V1E1, ATP6V1F, ATP6V1G1, ATP6V1H, BTBD9, C18orf8, C1orf85, CCZ1, CD164, CD63, CD68, CECR1, CLCN5, CLCN6, CLCN7, CLN3, CLN5, CLU, COL6A1, CP, CPVL, CREG1, CST7, CTBS, CTNS, CTSA, CTSB, CTSC, CTSD, CTSF, CTSH, CTSK, CTSO, CTSS, CTSZ, DAGLB, DEPDC5, DNAJC13, DNAJC5, DNASE1, DNASE2, DPP4, DPP7, ECE1, EGF, ELANE, ENPEP, ENPP1, ENTPD4, EPDR1, FLOT1, FLOT2, FUCA1, FUCA2, GAA, GALC, GALNS, GBA, GDAP2, GGH, GLA, GLB1, GM2A, GNAI1, GNAI2, GNAI3, GNAQ, GNB1, GNB2, GNB4, GNS, GPLD1, GPR137, GRN, GUSB, HEXA, HEXB, HGSNAT, HPSE, HYAL1, HYAL2, IDS, IDUA, IFI30, IL4I1, LAMP1, LAMP2, LAMP3, LAMTOR2, LAPTM4A, LAPTM5, LGMN, LIPA, LITAF, LMBRD1, LNPEP, LRP1, LRP2, MAN2B1, MAN2B2, MANBA, MCOLN1, MCOLN2, MCOLN3, MFSD8, MIOS, MON1B, MPO, MTOR, MYLPF, NAAA, NAGA, NAGLU, NAPA, NAPG, NCSTN, NEU1, NEU4, NPC1, NPC2, NSF, OSTM1, P2RX4, PCYOX1, PI4K2A, PLA2G15, PLBD1, PLBD2, PLD1, PLOD1, PPT1, PPT2, PRCP, PRTN3, PSAP, PSEN1, PTGDS, RAB14, RAB2A, RAB5C, RDH14, RNASE1, RNASE6, RNASET2, RNF13, RPTOR, RRAGA, RRAGB, SCARB1, SCARB2, SCPEP1, SGSH, SIAE, SIDT2, SLC11A1, SLC11A2, SLC12A4, SLC15A3, SLC17A5, SLC26A11, SLC29A3, SLC2A13, SLC2A8, SLC30A2, SLC36A1, SLC44A2, SMCR8, SMPD1, SMPD4, SMPDL3A, SPG11, SPHK2, SPNS1, SPPL2A, STARD3, STARD3NL, STX7, TCIRG1, TLR3, TM9SF1, TMEM1, TMEM175, TMEM192, TMEM55A, TMEM55B, TMEM63A, TMEM74, TMEM8A, TMEM9, TMEM92, TPP1, UBA52, VAMP7, VASN, VPS11, VPS16, VPS18, VPS33A, VPS35, VPS39, VPS41, WDR11, WDR41, ZFYVE26*

### **Autophagy genes**

*AAMP, AFF4, ALDOA, AMBRA1, APOL1, ARNT, ARSA, ARSB, ATF4, ATF6, ATG10, ATG12, ATG16L1, ATG16L2, ATG2A, ATG2B, ATG3, ATG4A, ATG4B, ATG4C, ATG4D, ATG5, ATG7, ATG9A, ATG9B, ATIC, BAG1, BAG3, BAK1, BAX, BCL2, BCL2L1, BECN1, BID, BIRC5, BIRC6, BNIP1, BNIP3, BNIP3L, C12orf44, CALCOCO2, CAMKK2, CANX, CAPN1, CAPN10, CAPN2, CAPNS1, CASP1, CASP3, CASP4, CASP8, CCL2, CCR2, CD46, CDKN1A, CDKN1B, CDKN2A, CFLAR, CHMP2B, CHMP4B, CLDN9, CLN3, CSNK1A1, CTSB, CTSD, CX3CL1, CXCR4, DAPK1, DAPK2, DDIT3, DIRAS3, DLC1, DNAJB1, DNAJB9, DRAM1, EDEM1, EEF2, EEF2K, EGFR, EIF2AK2, EIF2AK3, EIF2S1, EIF4EBP1, EIF4G1, ERBB2, ERN1, ERO1L, FADD, FAS, FKBP1A, FKBP1B, FOS, FOXO1, FOXO3, GAA, GABARAP, GABARAPL1, GABARAPL2, GAPDH, GNAI3, GNB2L1, GOPC, GRID1, GRID2, HDAC1, HDAC6, HGS, HIF1A, HSP90AB1, HSPA5, HSPA8, HSPB8, IFNG, IKBKB, IKBKE, IL24, ILF2, INTS7, IRGM, ITGA3, ITGA6, ITGB1, ITGB4, ITPR1, KAT8, KIAA0226, KIF5B, KLHL24, LAMP1, LAMP2, MAP1LC3A, MAP1LC3B, MAP1LC3C, MAP2K7, MAPK1, MAPK3, MAPK8, MAPK8IP1, MAPK9, MBTPS2, MLST8, MTMR14, MTOR, MYC, NAF1, NAMPT, NBR1, NCKAP1, NFE2L2, NFKB1, NKX2-3, NLRC4, NPC1, NRG1, NRG2, NRG3, P4HB, PARK2, PARP1, PEA15, PELP1, PEX14, PEX3, PIK3C3, PIK3R4, PINK1, PPP1R15A, PPP1R15B, PRKAB1, PRKAR1A, PRKCD, PRKCQ, PTEN, PTK6, RAB11A, RAB1A, RAB24, RAB33B, RAB5A, RAB7A, RAC1, RAF1, RB1, RB1CC1, RBX1, RELA, RGS19, RHEB, RPS6KB1, RPTOR, SAR1A, SERPINA1, SESN2, SH3GLB1, SIRT1, SIRT2, SPHK1, SPNS1, SQSTM1, ST13, STK11, TBK1, TM9SF1, TMEM74, TNFSF10, TP53,*

*TP53INP2, TP63, TP73, TSC1, TSC2, TUSC1, ULK1, ULK2, ULK3, USP10, UVRAG, VAMP3, VAMP7, VEGFA, WDFY3, WDR45, WIPI1, WIPI2, ZFYVE1*

### **Mitochondrial genes**

*AADAT, AARS2, AASS, ABAT, ABCA13, ABCA9, ABCB10, ABCB6, ABCB7, ABCB8, ABCB9, ABCD1, ABCD2, ABCD3, ABCF2, ABHD10, ABHD11, ACAA1, ACAA2, ACACA, ACACB, ACAD10, ACAD11, ACAD8, ACAD9, ACADL, ACADM, ACADS, ACADSB, ACADVL, ACAT1, ACCS, ACLY, ACN9, ACO1, ACO2, ACOT13, ACOT2, ACOT7, ACOT9, ACOX1, ACOX3, ACP6, ACSF2, ACSF3, ACSL1, ACSL4, ACSL6, ACSM1, ACSM2A, ACSM3, ACSM5, ACSS1, ACSS3, ACYP2, ADCK1, ADCK2, ADCK3, ADCK4, ADCK5, ADHFE1, AFG3L2, AGK, AGMAT, AGPAT5, AGR2, AGXT, AGXT2, AHCYL1, AIFM1, AIFM2, AIFM3, AK2, AK3, AK4, AKAP1, AKAP10, AKR1B10, AKR7A2, ALAS1, ALAS2, ALDH18A1, ALDH1B1, ALDH1L1, ALDH1L2, ALDH2, ALDH3A2, ALDH4A1, ALDH5A1, ALDH6A1, ALDH7A1, ALDH9A1, ALKBH1, ALKBH3, ALKBH7, AMACR, AMT, ANGEL2, APEX2, APOA1BP, APOO, APOOL, APOPT1, ARF5, ARG2, ARL2, ARMC10, ARMS2, ASAH2, ATAD1, ATAD3A, ATAD3B, ATIC, ATP10D, ATP5A1, ATP5B, ATP5C1, ATP5D, ATP5E, ATP5F1, ATP5G1, ATP5G2, ATP5G3, ATP5H, ATP5I, ATP5J, ATP5J2, ATP5J2-PTCD1, ATP5L, ATP5O, ATP5S, ATP5SL, ATPAF1, ATPAF2, ATPIF1, ATXN2, AUH, AURKAIP1, BAD, BAK1, BAX, BCAT2, BCKDHA, BCKDHB, BCKDK, BCL2, BCL2L1, BCL2L13, BCL2L2, BCS1L, BDH1, BID, BLOC1S1, BNIP3, BNIP3L, BOLA1, BOLA3, BPHL, C10orf10, C10orf2, C12orf10, C12orf65, C14orf159, C14orf2, C15orf40, C15orf48, C15orf61, C16orf91, C17orf89, C19orf52, C19orf70, C1QBP, C20orf24, C21orf33, C2orf47, C2orf69, C3orf33, C5orf63, C6orf136, C6orf203, C6orf57, C7orf55, C8orf82, CA5A, CA5B, CARKD, CARS2, CASP8, CAT, CBR3, CBR4, CCBL2, CCDC109B, CCDC127, CCDC51, CCDC58, CCDC90B, CCT7, CDC25C, CECR5, CEP89, CHCHD1, CHCHD10, CHCHD2, CHCHD3, CHCHD4, CHCHD5, CHCHD6, CHCHD7, CHDH, CHPT1, CISD1, CISD2, CISD3, CKMT1A, CKMT1B, CKMT2, CLIC4, CLPB, CLPP, CLPX, CLYBL, CMC1, CMC2, CMC4, CMPK2, COA1, COA3, COA4, COA5, COA6, COA7, COASY, COMT, COMTD1, COQ10A, COQ10B, COQ2, COQ3, COQ4, COQ5, COQ6, COQ7, COQ9, COX10, COX11, COX14, COX15, COX16, COX17, COX18, COX19, COX20, COX4I1, COX4I2, COX5A, COX5B, COX6A1, COX6A2, COX6B1, COX6B2, COX6C, COX7A1, COX7A2, COX7A2L, COX7B, COX7C, COX8A, COX8C, CPOX, CPS1, CPT1A, CPT1B, CPT1C, CPT2, CRAT, CRLS1, CROT, CRY1, CRYZ, CS, CYB5A, CYB5B, CYB5R2, CYB5R3, CYC1, CYCS, CYP11A1, CYP11B2, CYP24A1, CYP27A1, CYP27B1, D2HGDH, DAP3, DARS2, DBI, DBT, DCAKD, DCXR, DDAH1, DDX28, DECR1, DGUOK, DHCR24, DHODH, DHRS1, DHRS4, DHRS7B, DHRSX, DHTKD1, DHX30, DIABLO, DLAT, DLD, DLST, DMGDH, DMPK, DNA2, DNAJA3, DNAJC11, DNAJC15, DNAJC19, DNAJC28, DNAJC30, DNAJC4, DNLZ, DNM1L, DTYMK, DUS2, DUSP26, DUT, EARS2, ECH1, ECHDC1, ECHDC2, ECHDC3, ECHS1, ECI1, ECI2, ECSIT, EEFSEC, EFHD1, EHHADH, ELAC2, EMC2, ENDOG, EPHX2, ERAL1, ETFA, ETFB, ETFDH, ETHE1, EXOG, FABP1, FAHD1, FAHD2A, FAM136A, FAM162A, FAM185A, FAM195A, FAM210A, FAM210B, FAM213A, FARS2, FASN, FASTK, FASTKD1, FASTKD2, FASTKD3, FASTKD5, FBXL4, FDPS, FDX1, FDX1L, FDXR, FECH, FH, FHIT, FIS1, FKBP10, FKBP8, FLAD1, FOXRED1, FPGS, FTH1, FTMT, FTSJ2, FUNDC1, FUNDC2, FXN, GADD45GIP1, GAPDH, GARS, GATC, GATM, GBAS, GCAT, GCDH, GCSH, GDAP1, GFER, GFM1, GFM2, GHITM, GK, GLDC, GLOD4, GLRX2, GLRX5, GLS, GLS2, GLUD1, GLYAT, GLYCTK, GNG5, GOLPH3, GOT2, GPAM, GPD2, GPI, GPT2, GPX1, GPX4, GRHRP, GRPEL1, GRPEL2, GRSF1, GSR, GSTK1, GSTO1, GSTZ1, GTPBP10, GTPBP3,*

GTPBP6, GUF1, GUK1, HADH, HADHA, HADHB, HAGH, HAO2, HARS2, HCCS, HDHD3, HEBP1, HEMK1, HIBADH, HIBCH, HIGD1A, HIGD2A, HINT1, HINT2, HINT3, HK1, HK2, HMBS, HMGCL, HMGCS2, HOGA1, HRSP12, HSCB, HSD17B10, HSD17B4, HSD17B8, HSDL1, HSDL2, HSPA9, HSPB7, HSPD1, HSPE1, HTATIP2, HTRA2, IARS2, IBA57, ICT1, IDE, IDH1, IDH2, IDH3A, IDH3B, IDH3G, IDI1, IFI27, IMMP1L, IMMP2L, IMMT, ISCA1, ISCA2, ISCU, ISOC2, IVD, KARS, KIAA0100, KIAA0141, KIAA0391, KIF1B, KMO, KRT5, L2HGDH, LACE1, LACTB, LACTB2, LAMC1, LAP3, LARS2, LDHAL6B, LDHB, LDHD, LETM1, LETM2, LETMD1, LIAS, LIPT1, LIPT2, LONP1, LONP2, LRPPRC, LYPLA1, LYPLAL1, LYRM1, LYRM2, LYRM4, LYRM5, LYRM7, LYRM9, MACROD1, MALSU1, MAOA, MAOB, MARC1, MARC2, MARCH5, MARS2, MAVS, MCAT, MCCC1, MCCC2, MCEE, MCU, MCUR1, MDH1, MDH2, ME1, ME2, ME3, MECR, METAP1D, METTL15, METTL17, METTL5, METTL8, MFF, MFN1, MFN2, MGARP, MGME1, MGST1, MGST3, MICU1, MICU2, MIEF1, MINOS1, MIPEP, MLH1, MLYCD, MMAB, MMACHC, MMADHC, MOCS1, MPC1, MPC2, MPST, MPV17, MPV17L, MPV17L2, MRM1, MRPL1, MRPL10, MRPL11, MRPL12, MRPL13, MRPL14, MRPL15, MRPL16, MRPL17, MRPL18, MRPL19, MRPL2, MRPL20, MRPL21, MRPL22, MRPL23, MRPL24, MRPL27, MRPL28, MRPL3, MRPL30, MRPL32, MRPL33, MRPL34, MRPL35, MRPL36, MRPL37, MRPL38, MRPL39, MRPL4, MRPL40, MRPL41, MRPL42, MRPL43, MRPL44, MRPL45, MRPL46, MRPL47, MRPL48, MRPL49, MRPL50, MRPL51, MRPL52, MRPL53, MRPL54, MRPL55, MRPL57, MRPL9, MRPS10, MRPS11, MRPS12, MRPS14, MRPS15, MRPS16, MRPS17, MRPS18A, MRPS18B, MRPS18C, MRPS2, MRPS21, MRPS22, MRPS23, MRPS24, MRPS25, MRPS26, MRPS27, MRPS28, MRPS30, MRPS31, MRPS33, MRPS34, MRPS35, MRPS36, MRPS5, MRPS6, MRPS7, MRPS9, MRRF, MRS2, MSRA, MSRB2, MSRB3, MTCH1, MTCH2, MTCP1, MTERF, MTERFD1, MTERFD2, MTERFD3, MTFMT, MTFP1, MTFR1, MTFR1L, MTG1, MTG2, MTHFD1, MTHFD1L, MTHFD2, MTHFD2L, MTHFS, MTIF2, MTIF3, MTO1, MTPAP, MTRF1, MTRF1L, MTX1, MTX2, MUL1, MUT, MUTYH, NADK2, NAGS, NARS2, NBR1, NCEH1, NCOA4, NDUFA1, NDUFA10, NDUFA11, NDUFA12, NDUFA13, NDUFA2, NDUFA3, NDUFA4, NDUFA5, NDUFA6, NDUFA7, NDUFA8, NDUFA9, NDUFAB1, NDUFAF1, NDUFAF2, NDUFAF3, NDUFAF4, NDUFAF5, NDUFAF6, NDUFAF7, NDUFB1, NDUFB10, NDUFB11, NDUFB2, NDUFB3, NDUFB4, NDUFB5, NDUFB6, NDUFB7, NDUFB8, NDUFB9, NDUFC1, NDUFC2, NDUFS1, NDUFS2, NDUFS3, NDUFS4, NDUFS5, NDUFS6, NDUFS7, NDUFS8, NDUFV1, NDUFV2, NDUFV3, NEU4, NFS1, NFU1, NGRN, NIF3L1, NIPSNAP1, NIPSNAP3A, NIPSNAP3B, NIT1, NIT2, NLN, NLRX1, NME3, NME4, NME6, NMNAT3, NNT, NOA1, NRD1, NSUN3, NSUN4, NT5C, NT5DC2, NT5DC3, NT5M, NTHL1, NUBPL, NUCB2, NUDT13, NUDT19, NUDT2, NUDT5, NUDT6, NUDT8, NUDT9, OAT, OBSCN, OCIAD1, OCIAD2, OGDH, OGDHL, OGG1, OMA1, OPA1, OPA3, OSBPL1A, OSGEPL1, OTC, OXA1L, OXCT1, OXLD1, OXNAD1, OXR1, OXSM, P4HB, PACSIN2, PAICS, PAK7, PAM16, PANK2, PARK7, PARL, PARS2, PC, PCBD2, PCCA, PCCB, PCK2, PDE12, PDF, PDHA1, PDHA2, PDHB, PDHX, PDK1, PDK2, PDK3, PDK4, PDP1, PDP2, PDPR, PDSS1, PDSS2, PET100, PET112, PET117, PEX11B, PGAM5, PGS1, PHB, PHB2, PHYH, PI4KA, PICK1, PIF1, PINK1, PISD, PITRM1, PKLR, PLGRKT, PMAIP1, PMPCA, PMPCB, PNPLA8, PNPO, PNPT1, POLDIP2, POLG, POLG2, POLRMT, PPA2, PPIF, PPM1K, PPOX, PPTC7, PPWD1, PRDX2, PRDX3, PRDX4, PRDX5, PRDX6, PRELID1, PRELID2, PREPL, PRODH, PRODH2, PROSC, PRSS35, PSMA6, PSTK, PTC1, PTC2, PTC3, PTGES2, PTPMT1, PTPN4, PTRH1, PTRH2, PTS, PUS1, PUSL1, PXMP2, PXMP4, PYCR1, PYCR2, PYURF, QDPR, QRSL1, QTRT1, RAB11FIP5, RAB24, RAB32, RAB35, RARS, RARS2, RBFA,



*RCN2, RDH11, RDH13, RDH14, RECQL4, REXO2, RFK, RHOT1, RHOT2, RMDN1, RMDN3, RMND1, RNASEH1, RNMTL1, ROMO1, RPIA, RPL10A, RPL34, RPL35A, RPS14, RPS15A, RPS18, RPUSD3, RPUSD4, RSAD1, RTN4IP1, SAMM50, SARDH, SARS2, SCCPDH, SCO1, SCO2, SCP2, SDHA, SDHAF1, SDHAF2, SDHB, SDHC, SDHD, SDR39U1, SDSL, SECISBP2, SELO, SEPT4, SERAC1, SERHL2, SETD9, SFXN1, SFXN2, SFXN3, SFXN4, SFXN5, SHMT1, SHMT2, SIRT3, SIRT4, SIRT5, SLC16A1, SLC16A11, SLC16A7, SLC22A4, SLC25A1, SLC25A10, SLC25A11, SLC25A12, SLC25A13, SLC25A14, SLC25A15, SLC25A16, SLC25A17, SLC25A18, SLC25A19, SLC25A20, SLC25A21, SLC25A22, SLC25A23, SLC25A24, SLC25A25, SLC25A26, SLC25A27, SLC25A28, SLC25A29, SLC25A3, SLC25A30, SLC25A31, SLC25A32, SLC25A33, SLC25A34, SLC25A35, SLC25A36, SLC25A37, SLC25A38, SLC25A39, SLC25A4, SLC25A40, SLC25A41, SLC25A42, SLC25A43, SLC25A44, SLC25A45, SLC25A46, SLC25A47, SLC25A48, SLC25A5, SLC25A51, SLC25A53, SLC25A6, SLC30A6, SLC30A9, SLC37A4, SLIRP, SLMO1, SLMO2, SMDT1, SNAP29, SND1, SOD1, SOD2, SPATA19, SPATA20, SPG7, SPR, SPRYD4, SPTLC2, SQRDL, SSBP1, STAR, STARD7, STOM, STOML1, STOML2, STX17, SUCLA2, SUCLG1, SUCLG2, SUOX, SUPV3L1, SURF1, SYNJ2BP, TACO1, TAMM41, TARS, TARS2, TBRG4, TCAIM, TCHP, TCIRG1, TDRKH, TEFM, TFAM, TFB1M, TFB2M, THEM4, THG1L, THNSL1, TIMM10, TIMM10B, TIMM13, TIMM17A, TIMM17B, TIMM21, TIMM22, TIMM23, TIMM44, TIMM50, TIMM8A, TIMM8B, TIMM9, TIMMDC1, TK2, TKT, TMBIM4, TMEM11, TMEM126A, TMEM126B, TMEM143, TMEM14C, TMEM177, TMEM186, TMEM205, TMEM65, TMEM70, TMLHE, TOMM20, TOMM22, TOMM34, TOMM40, TOMM40L, TOMM5, TOMM6, TOMM7, TOMM70A, TOP1MT, TOP3A, TPI1, TRAP1, TRIAP1, TRIT1, TRMT1, TRMT10C, TRMT11, TRMT2B, TRMT61B, TRMU, TRNT1, TRUB2, TSFM, TSPO, TST, TSTD1, TSTD3, TTC19, TUBB3, TUFM, TXN2, TXNDC12, TXNRD1, TXNRD2, TYSND1, UCP1, UCP2, UCP3, UNG, UQCC1, UQCC2, UQCR10, UQCR11, UQCRB, UQCRC1, UQCRC2, UQCRFS1, UQCRH, UQCRQ, USMG5, VARS2, VDAC1, VDAC2, VDAC3, VWA8, WARS2, WBSCR16, WDR81, XPNPEP3, XRCC6BP1, YARS2, YBEY, YME1L1, ZADH2*

### Non-targeted gene-set enrichment analysis of PD-associated regions

Overall, we found the PD associated regions to be enriched for genes in the lysosomal KEGG pathway ( $P_{\text{adjusted}}=0.02$ ) (Supplementary Table 12). Of the 115 genes mapping to this pathway, 12 mapped to 8 of the PD associated intervals (*SCARB2, PSAPL1, ATP6V0A1, NEU1, PPT2, NAGLU, IDUA, LAMP3, GBA, GALC, ABCB9, and CTSB*). Our candidate gene pipeline had nominated four of these twelve genes (*ATP6V0A1, GBA, GALC AND CTSB*). We note that both *NAGLU* and *ATP6V0A1* were within 250kb of the index SNP rs601999, though only *ATP6V0A1* was nominated by our candidate pipeline as a candidate gene.

### 23andMe Research Team

Michelle Agee, Babak Alipanahi, Adam Auton, Robert K. Bell, Katarzyna Bryc, Sarah L. Elson, Pierre Fontanillas, Nicholas A. Furlotte, David A. Hinds, Bethann S.

Hromatka, Karen E. Huber, Aaron Kleinman, Nadia K. Litterman, Matthew H. McIntyre, Joanna L. Mountain, Elizabeth S. Noblin, Carrie A.M. Northover, Steven J. Pitts, J. Fah Sathirapongsasuti, Olga V. Sazonova, Janie F. Shelton, Suyash Shringarpure, Chao Tian, Vladimir Vacic, and Catherine H. Wilson

**IPDGC consortium members and affiliations:**

Alastair J Noyce (Department of Molecular Neuroscience, UCL, London, UK), Alexis Brice (Institut du Cerveau et de la Moelle épinière, ICM, Inserm U 1127, CNRS, UMR 7225, Sorbonne Universités, UPMC University Paris 06, UMR S 1127, AP-HP, Pitié-Salpêtrière Hospital, Paris, France), Anamika Giri (Department for Neurodegenerative Diseases, Hertie Institute for Clinical Brain Research, University of Tübingen, and DZNE, German Center for Neurodegenerative Diseases, Tübingen, Germany), Angelika Oehmig (Department for Neurodegenerative Diseases, Hertie Institute for Clinical Brain Research, University of Tübingen, and DZNE, German Center for Neurodegenerative Diseases, Tübingen, Germany), Arianna Tucci (Department of Molecular Neuroscience, UCL Institute of Neurology, London, UK), Aude Nicolas (Laboratory of Neurogenetics, National Institute on Aging, Bethesda, MD, USA), Claudia Schulte (Department for Neurodegenerative Diseases, Hertie Institute for Clinical Brain Research), Mark R Cookson (Laboratory of Neurogenetics, National Institute on Aging, Bethesda, USA), Cornelis Blauwendraat (Laboratory of Neurogenetics, National Institute on Aging, Bethesda, USA), Kathrin Brockmann (Department for Neurodegenerative Diseases, Hertie Institute for Clinical Brain Research, University of Tübingen, and DZNE, German Center for Neurodegenerative Diseases, Tübingen, Germany), Demis Kia (UCL Genetics Institute; and Department of Molecular Neuroscience, UCL Institute of Neurology, London, UK), Fabrice Danjou (Institut du Cerveau et de la Moelle épinière, ICM, Inserm U 1127, CNRS, UMR 7225, Sorbonne Universités, UPMC University Paris 06, UMR S 1127, AP-HP, Pitié-Salpêtrière Hospital, Paris, France), Faraz Faghri (Laboratory of Neurogenetics, National Institute on Aging, Bethesda, USA; Department of Computer Science, University of Illinois at Urbana-Champaign, Urbana, IL, USA), Gavin Charlesworth (Department of Molecular Neuroscience, UCL Institute of Neurology, London, UK), J Raphael Gibbs (Laboratory of Neurogenetics, National Institute on Aging, Bethesda, MD, USA; and Department of Molecular Neuroscience, UCL Institute of Neurology, London, UK), Huw R Morris (National Hospital for Neurology and Neurosurgery, University College London, London, UK), Helene Plun-Favreau (Department of Molecular Neuroscience, UCL Institute of Neurology, London, UK), Dena G Hernandez (Laboratory of Neurogenetics, National Institute on Aging, Bethesda, MD, USA; and Department of Molecular Neuroscience, UCL Institute of Neurology, London, UK), Peter Holmans (Biostatistics &

Bioinformatics Unit, Institute of Psychological Medicine and Clinical Neuroscience, MRC Centre for Neuropsychiatric Genetics & Genomics, Cardiff, UK), Huw R Morris (National Hospital for Neurology and Neurosurgery, University College London, London, UK), Iris Jansen (VU University Medical Center, Amsterdam, Netherlands), John Hardy (Department of Molecular Neuroscience, UCL Institute of Neurology, London, UK), Javier Simón-Sánchez (Department for Neurodegenerative Diseases, Hertie Institute for Clinical Brain Research, University of Tübingen, and DZNE, German Center for Neurodegenerative Diseases, Tübingen, Germany), Jose M Bras (Department of Molecular Neuroscience, UCL Institute of Neurology, London, UK), Joshua M. Shulman (Baylor College of Medicine, Houston, Texas, USA), John Quinn (Institute of Translational Medicine, University of Liverpool, Liverpool, UK), Juan A. Botía (Universidad de Murcia, Murcia, Spain), Kin Y Mok (Department of Molecular Neuroscience, UCL Institute of Neurology, London, UK), Kimberley Billingsley (Institute of Translational Medicine, University of Liverpool, Liverpool, UK), Lasse Pihlstrom (Department of Neurology, Oslo University Hospital, Oslo, Norway), Lea R'Bibo (Department of Molecular Neuroscience, UCL Institute of Neurology, London, UK), Codrin Lungu (National Institutes of Health Parkinson Clinic, NINDS, National Institutes of Health, Bethesda, MD, USA), Manu Sharma (Centre for Genetic Epidemiology, Institute for Clinical Epidemiology and Applied Biometry, University of Tübingen and Department for Neurodegenerative Diseases, Hertie Institute for Clinical Brain Research, University of Tübingen Germany), Maria Martinez (INSERM UMR 1220; and Paul Sabatier University, Toulouse, France), Mina Ryten (Department of Molecular Neuroscience, UCL Institute of Neurology, London, UK), Valentina Escott-Price (MRC Centre for Neuropsychiatric Genetics and Genomics, Cardiff University School of Medicine, Cardiff, UK), Niccolo E. Mencacci (Department of Molecular Neuroscience, UCL, London, UK), Mike A. Nalls (Laboratory of Neurogenetics, National Institute on Aging, Bethesda, USA; Contractor/consultant with Data Tecnica, MD, USA), Nicholas W Wood (UCL Genetics Institute; and Department of Molecular Neuroscience, UCL Institute of Neurology, London, UK), Patrick Lewis (University of Reading, Reading, UK), Paul Denny (University College London, London, UK), Peter Heutink (DZNE, German Center for Neurodegenerative Diseases and Department for Neurodegenerative Diseases, Hertie Institute for Clinical Brain Research, University of Tübingen, Tübingen, Germany), Patrizia Rizzu (DZNE, German Center for Neurodegenerative Diseases), Pille Taba (Department of Neurology and Neurosurgery, University of Tartu, Tartu, Estonia), Rita Guerreiro (Department of Molecular Neuroscience, UCL Institute of Neurology, London, UK), Ruth Lovering (University College London, London, UK), Raquel Duran Ogalla (University College London, London, UK), Rebecca Foulger (University College London, London, UK), Laurie Robak (Baylor College of Medicine, Houston, Texas, USA), Steven Lubbe (Ken and Ruth Davee Department of Neurology, Northwestern

University Feinberg School of Medicine, Chicago, IL, USA), Steven Finkbeiner (Departments of Neurology and Physiology, University of California, San Francisco; Gladstone Institute of Neurological Disease; Taube/Koret Center for Neurodegenerative Disease Research, San Francisco, CA, USA), Sigurlaug Sveinbjörnsdóttir (Department of Neurology, Landspítali University Hospital, Reykjavík, Iceland; Department of Neurology, MEHT Broomfield Hospital, Chelmsford, Essex, UK; and Queen Mary College, University of London, London, UK), Andrew B Singleton (Laboratory of Neurogenetics, National Institute on Aging, Bethesda, MD, USA), Sonja Scholz (Neurodegenerative Diseases Research Unit, National Institute of Neurological Disorders and Stroke, Bethesda, MD, USA), Sulev Koks (Department of Pathophysiology, University of Tartu, Tartu, Estonia), Suzanne Lesage (Institut du Cerveau et de la Moelle épinière, ICM, Inserm U 1127, CNRS, UMR 7225, Sorbonne Universités, UPMC University Paris 06, UMR S 1127, AP-HP, Pitié-Salpêtrière Hospital, Paris, France), Jean-Christophe Corvol (Institut du Cerveau et de la Moelle épinière, ICM, Inserm U 1127, CNRS, UMR 7225, Sorbonne Universités, UPMC University Paris 06, UMR S 1127, Centre d'Investigation Clinique Pitié Neurosciences CIC-1422, AP-HP, Pitié-Salpêtrière Hospital, Paris, France), Thomas Foltynie (UCL Institute of Neurology, London, UK), Thomas Gasser (Department for Neurodegenerative Diseases, Hertie Institute for Clinical Brain Research, and DZNE, German Center for Neurodegenerative Diseases, Tübingen, Germany), T. Ryan Price (University California Irvine, Irvine, CA, USA), Una-Marie Sheerin (Department of Molecular Neuroscience, UCL Institute of Neurology, London, UK), Nigel Williams (MRC Centre for Neuropsychiatric Genetics and Genomics, Cardiff, UK), Xylena Reed (Laboratory of Neurogenetics, National Institute on Aging, Bethesda, MD, USA).

### Acknowledgements

We thank the UK Parkinson's Disease Society Brain Bank (UKPDSBB). Mike A. Nalls' participation is supported by a consulting contract between Data Tecnica International and the National Institute on Aging, NIH, Bethesda, MD, USA. This work was supported in part by the Intramural Research Programs of the National Institute of Neurological Disorders and Stroke (NINDS), the National Institute on Aging (NIA), and the National Institute of Environmental Health Sciences both part of the National Institutes of Health, Department of Health and Human Services; project numbers Z01-AG000949-02 and Z01-ES101986. In addition this work was supported by the Department of Defense (award W81XWH-09-2-0128), and The Michael J Fox Foundation for Parkinson's Research. This work was supported by National Institutes of Health grants R01NS037167, R01CA141668, P50NS071674, American Parkinson Disease Association (APDA); Barnes Jewish Hospital

Foundation; Greater St Louis Chapter of the APDA; Hersenstichting Nederland; the Prinses Beatrix Fonds. The KORA (Cooperative Research in the Region of Augsburg) research platform was started and financed by the Forschungszentrum für Umwelt und Gesundheit, which is funded by the German Federal Ministry of Education, Science, Research, and Technology and by the State of Bavaria. This study was also funded by the German National Genome Network (NGFNplus number 01GS08134, German Ministry for Education and Research); by the German Federal Ministry of Education and Research (NGFN 01GR0468, PopGen); and 01EW0908 in the frame of ERA-NET NEURON and Helmholtz Alliance Mental Health in an Ageing Society (HA-215), which was funded by the Initiative and Networking Fund of the Helmholtz Association. The French GWAS work was supported by the French National Agency of Research (ANR-08-MNP-012). This study was also funded by France-Parkinson Association, the French program “Investissements d’avenir” funding (ANR-10-IAIHU-06) and a grant from Assistance Publique-Hôpitaux de Paris (PHRC, AOR-08010) for the French clinical data. This study was also sponsored by the Landspítali University Hospital Research Fund (grant to SSv); Icelandic Research Council (grant to SSv); and European Community Framework Programme 7, People Programme, and IAPP on novel genetic and phenotypic markers of Parkinson’s disease and Essential Tremor (MarkMD), contract number PIAP-GA-2008-230596 MarkMD (to HP and JHu). This study utilized the high-performance computational capabilities of the Biowulf Linux cluster at the National Institutes of Health, Bethesda, Md. (<http://biowulf.nih.gov>), and DNA panels, samples, and clinical data from the National Institute of Neurological Disorders and Stroke Human Genetics Resource Center DNA and Cell Line Repository. People who contributed samples are acknowledged in descriptions of every panel on the repository website. We thank the French Parkinson’s Disease Genetics Study Group and the Drug Interaction with genes (DIGPD) study group: Y Agid, M Anheim, A-M Bonnet, M Borg, A Brice, E Broussolle, J-C Corvol, P Damier, A Destée, A Dürr, F Durif, A Elbaz, D Grabil, S Klebe, P. Krack, E Lohmann, L. Lacomblez, M Martinez, V Mesnage, P Pollak, O Rascol, F Tison, C Tranchant, M Vérin, F Viallet, and M Vidailhet. We also thank the members of the French 3C Consortium: A Alperovitch, C Berr, C Tzourio, and P Amouyel for allowing us to use part of the 3C cohort, and D Zelenika for support in generating the genome-wide molecular data. We thank P Tienari (Molecular Neurology Programme, Biomedicum, University of Helsinki), T Peuralinna (Department of Neurology, Helsinki University Central Hospital), L Myllykangas (Folkhalsan Institute of Genetics and Department of Pathology, University of Helsinki), and R Sulkava (Department of Public Health and General Practice Division of Geriatrics, University of Eastern Finland) for the Finnish controls (Vantaa85+ GWAS data). We used genome-wide association data generated by the Wellcome Trust Case-Control Consortium 2 (WTCCC2) from UK patients with Parkinson’s disease and UK control

individuals from the 1958 Birth Cohort and National Blood Service. Genotyping of UK replication cases on ImmunoChip was part of the WTCCC2 project, which was funded by the Wellcome Trust (083948/Z/07/Z). UK population control data was made available through WTCCC1. This study was supported by the Medical Research Council and Wellcome Trust disease centre (grant WT089698/Z/09/Z to NW, JHa, and ASc). As with previous IPDGC efforts, this study makes use of data generated by the Wellcome Trust Case-Control Consortium. A full list of the investigators who contributed to the generation of the Data are available from [www.wtccc.org.uk](http://www.wtccc.org.uk). Funding for the project was provided by the Wellcome Trust under award 076113, 085475 and 090355. This study was also supported by Parkinson's UK (grants 8047, J-0804, and G-1307) and the Medical Research Council (G0700943 and G1100643). We thank Jeffrey Barrett and Jason Downing for assistance with the design of the ImmunoChip and NeuroX arrays. DNA extraction work that was done in the UK was undertaken at University College London Hospitals, University College London, who received a proportion of funding from the Department of Health's National Institute for Health Research Biomedical Research Centres funding. This study was supported in part by the Wellcome Trust/Medical Research Council Joint Call in Neurodegeneration award (WT089698) to the Parkinson's Disease Consortium (UKPDC), whose members are from the UCL Institute of Neurology, University of Sheffield, and the Medical Research Council Protein Phosphorylation Unit at the University of Dundee. Faraz Faghri's contribution to this work has been supported in part through the RDA/US Data Share grant from the Alfred P. Sloan Foundation #G-2014-13746 and supported by grant 1U54GM114838 awarded by NIGMS through funds provided by the trans-NIH big data to Knowledge (BD2K) initiative ([www.bd2k.nih.gov](http://www.bd2k.nih.gov)) and a collaborative award from the National Science Foundation (NSF award numbers CNS-1329686, CNS-1329737, CNS-1330142, and CNS-1330491). This work was supported by the Medical Research Council grant MR/N026004/1.

## SUPPLEMENTARY FIGURES

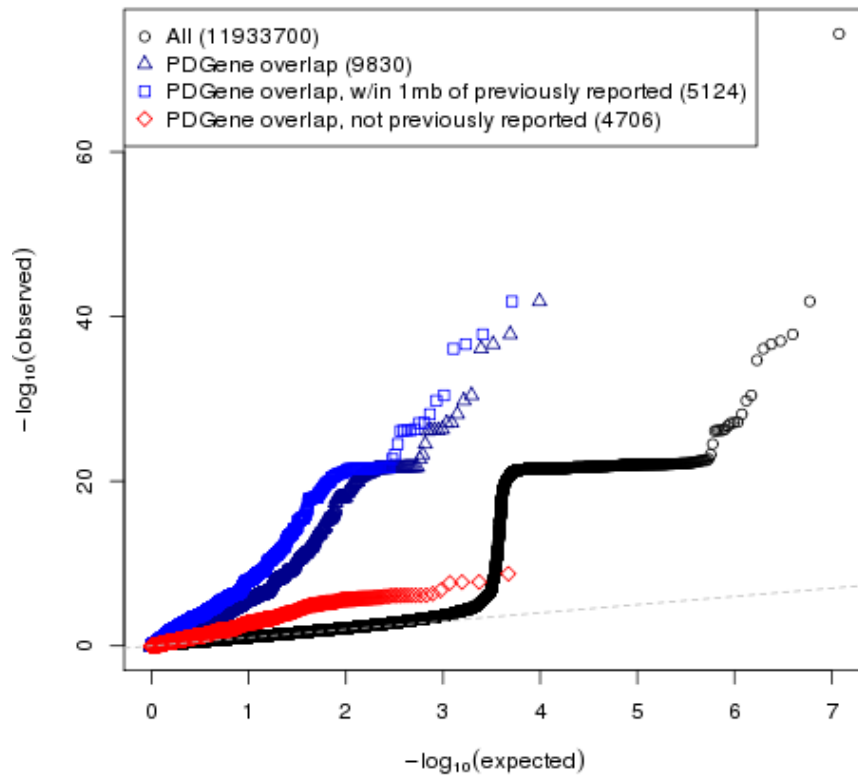

**Supplementary Figure 1. QQ-plot of PDWBS p-values. Genome-wide p-values for variants in PDWBS are shown in black circles (“All”, 11,933,700 SNPs). Association p-values for the 9,830 variants analyzed in this meta-analysis are shown in dark blue triangles (“PDGene overlap”). Of this subset, those within 1Mb of previously associated regions are displayed in blue squares (“PDGene overlap, w/in 1mb of previously reported”). The 4,706 variants outside of these regions are displayed in red diamonds (“PDGene overlap, not previously reported”).**

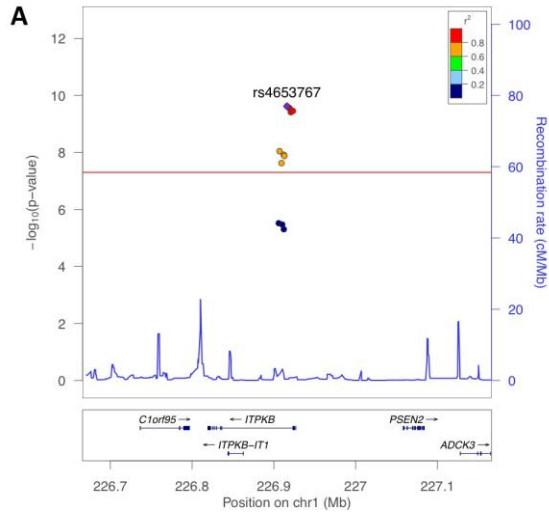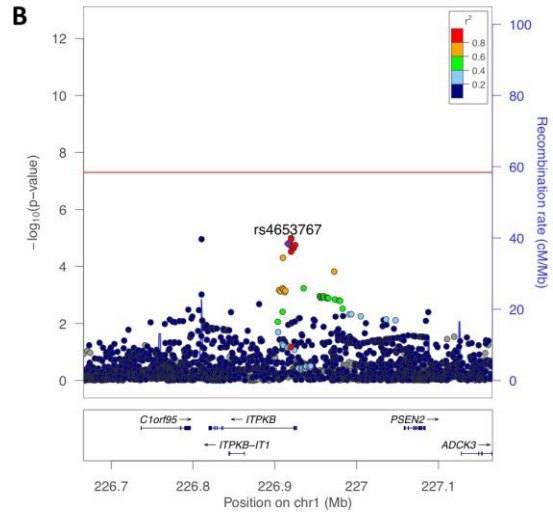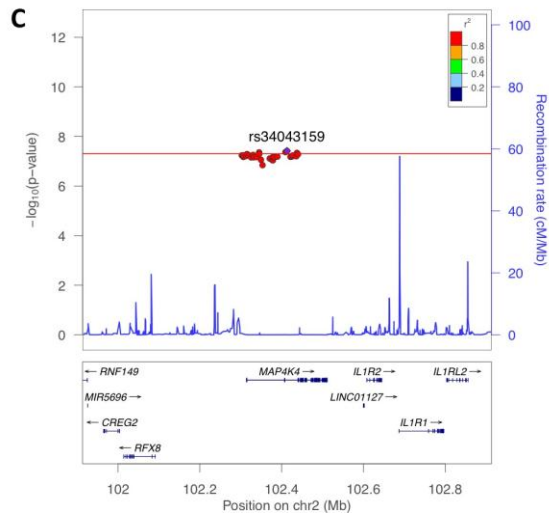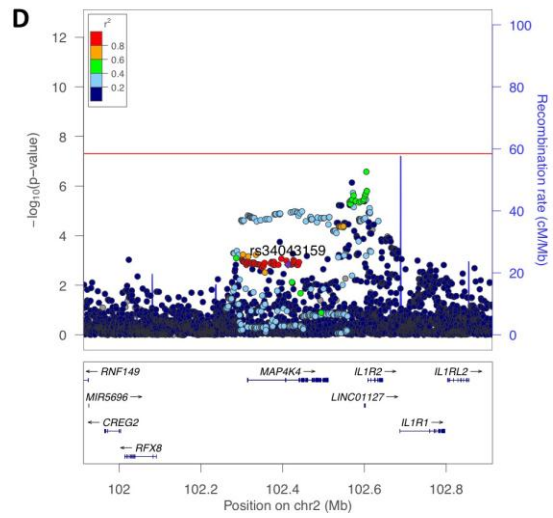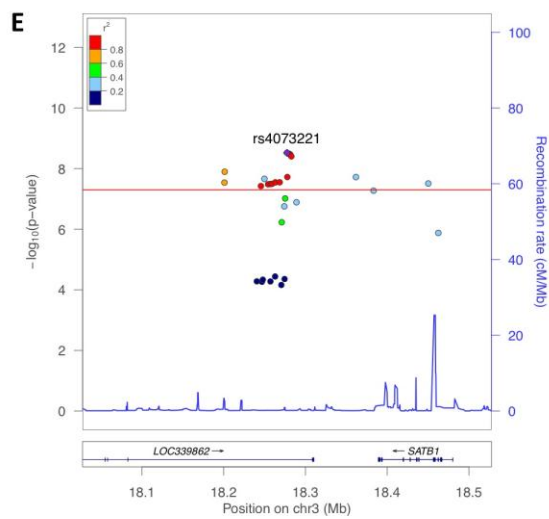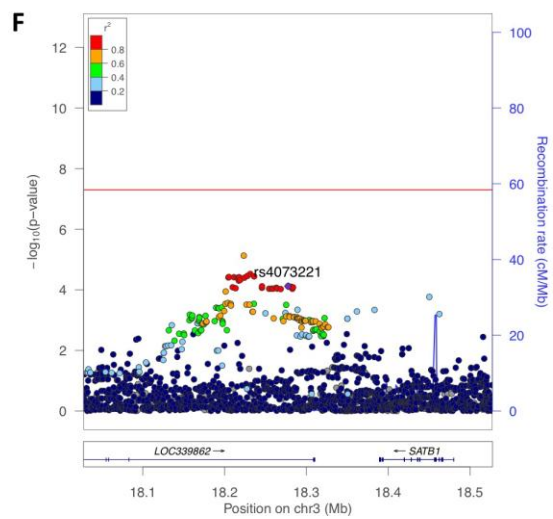



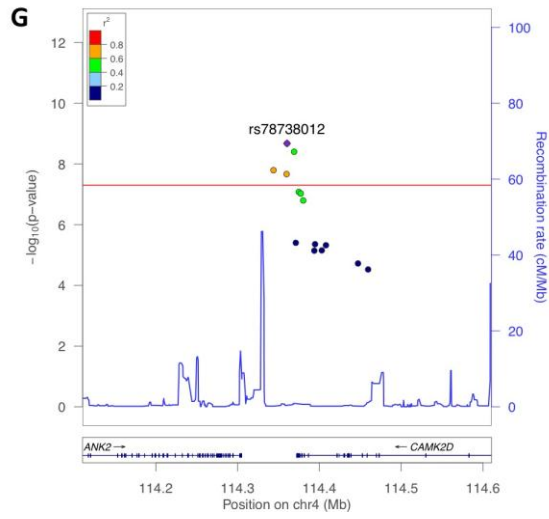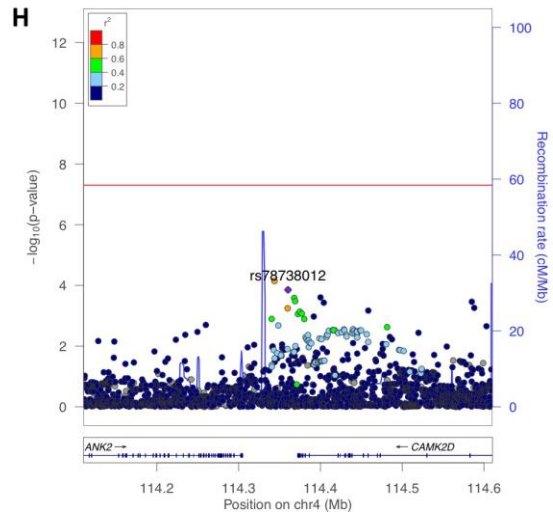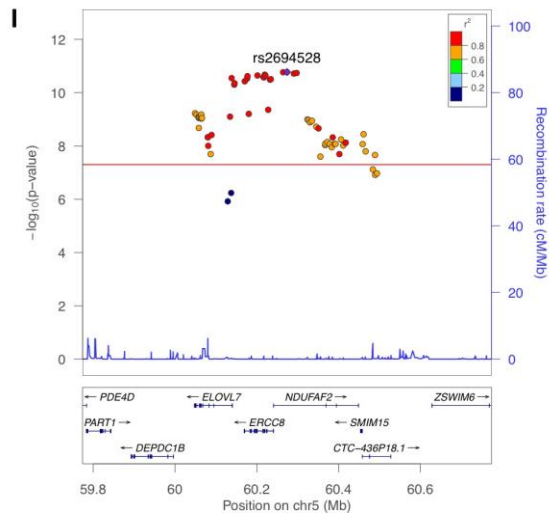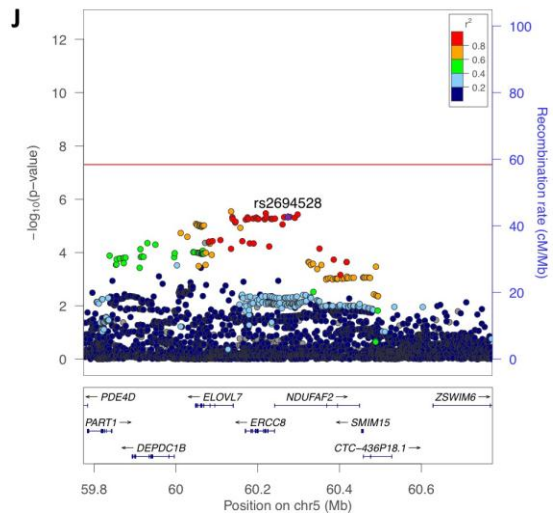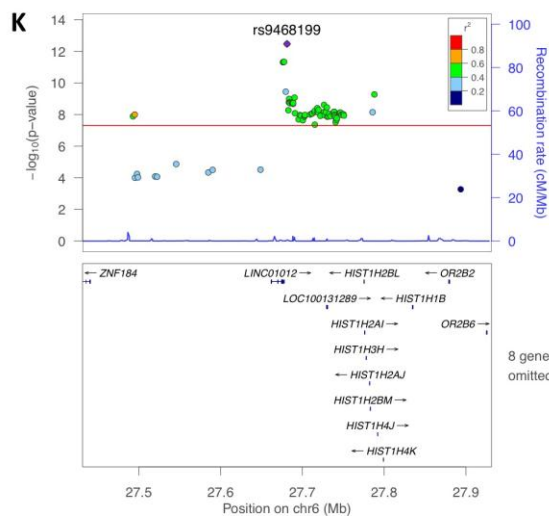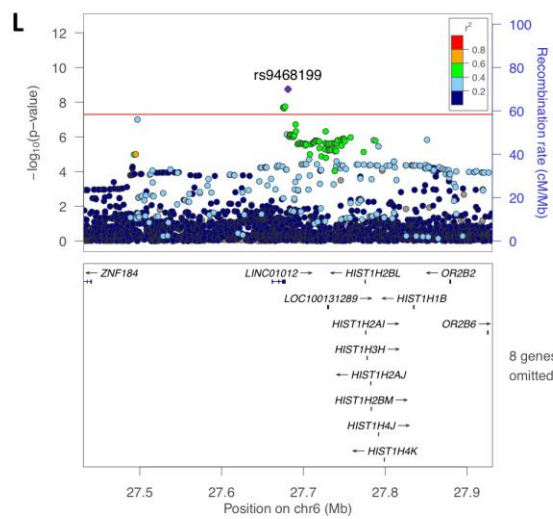

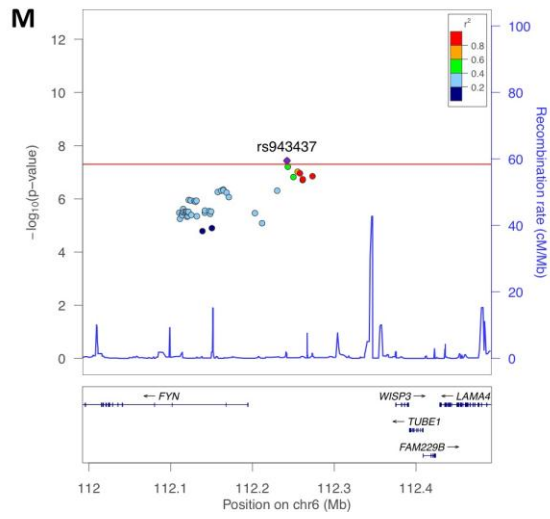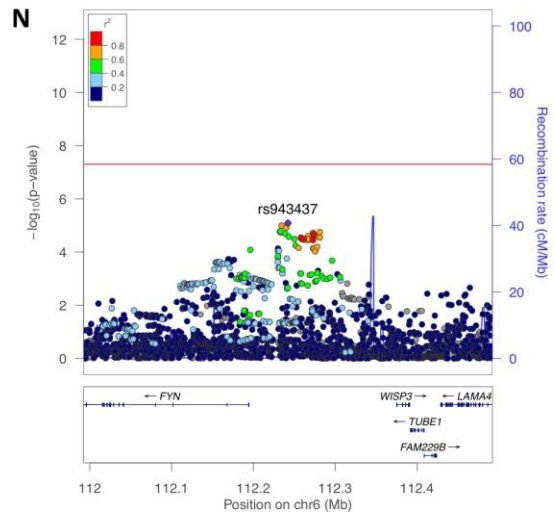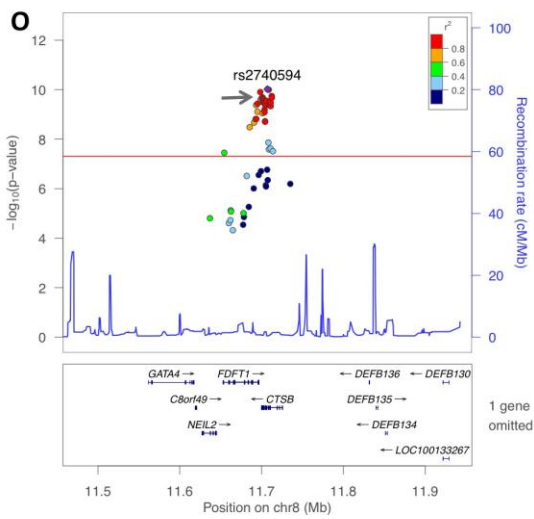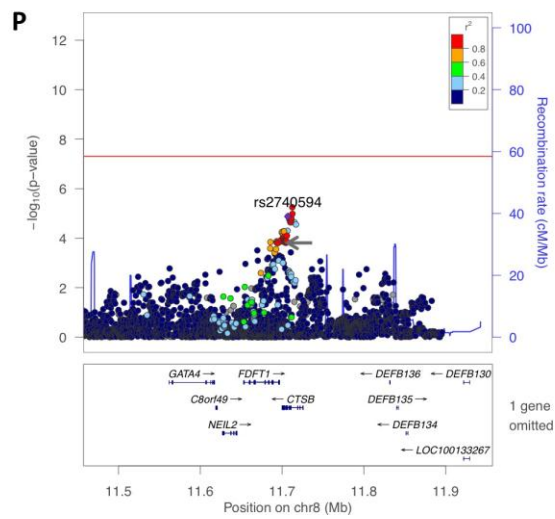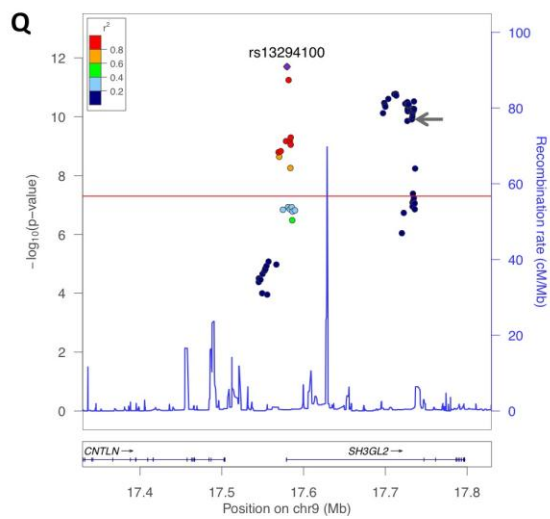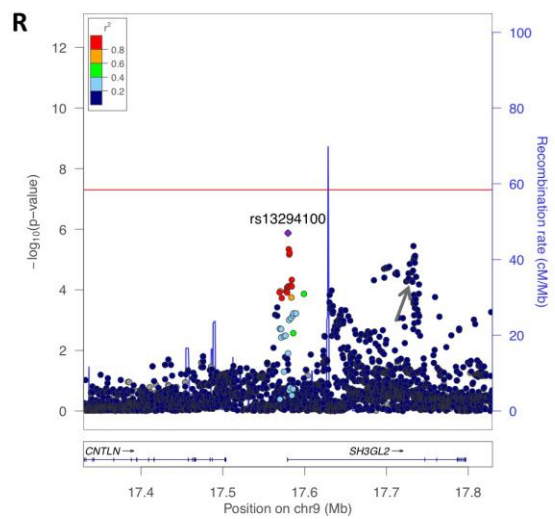

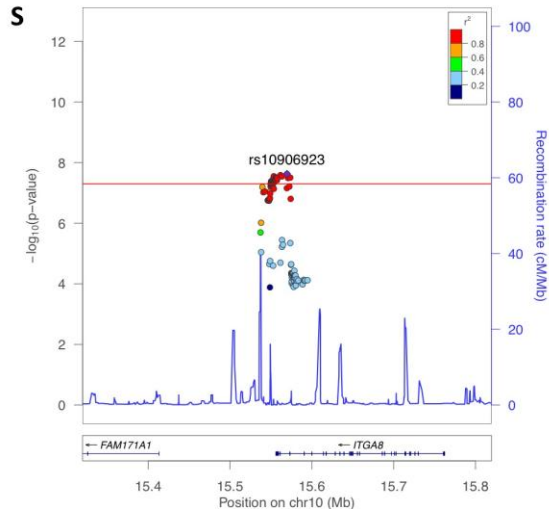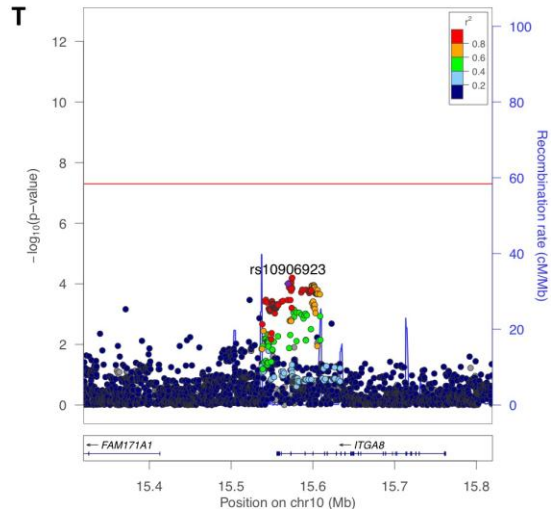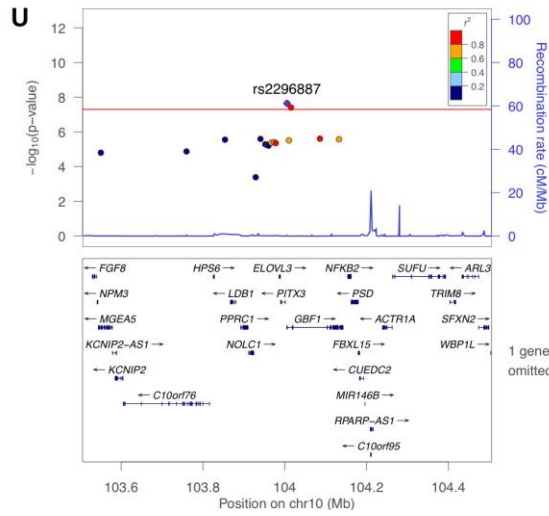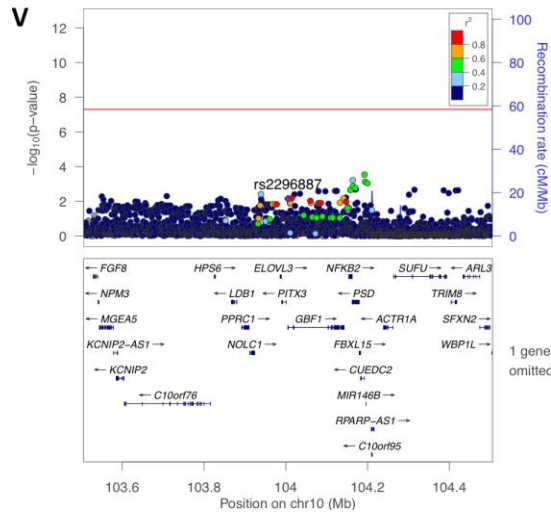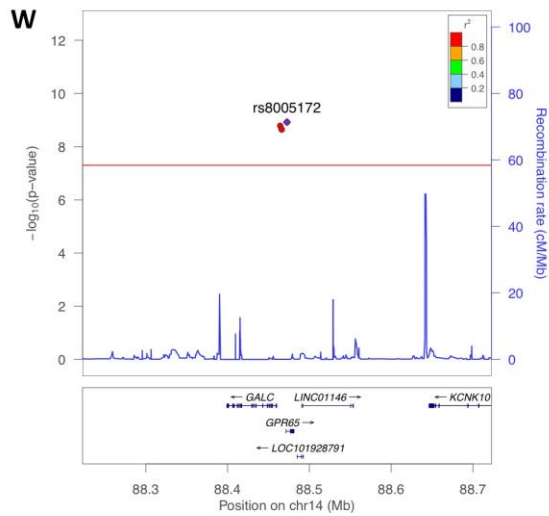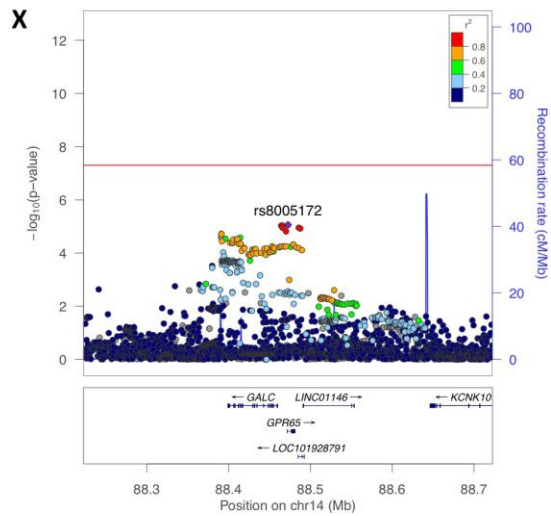

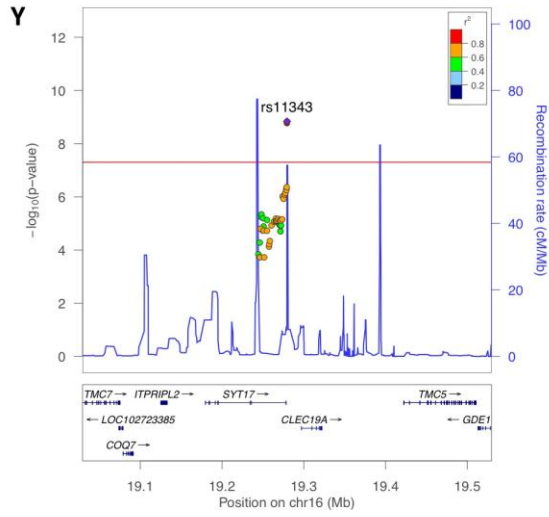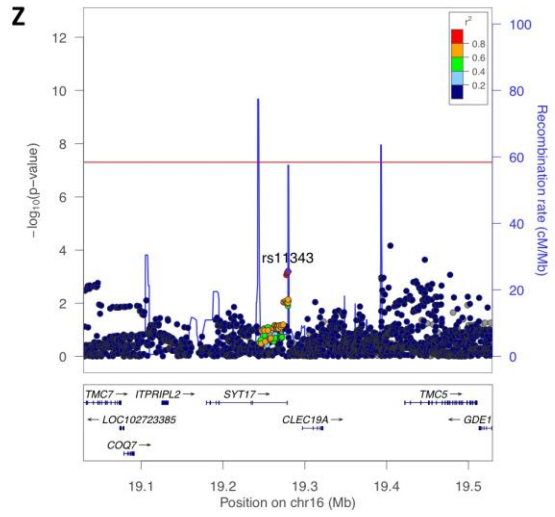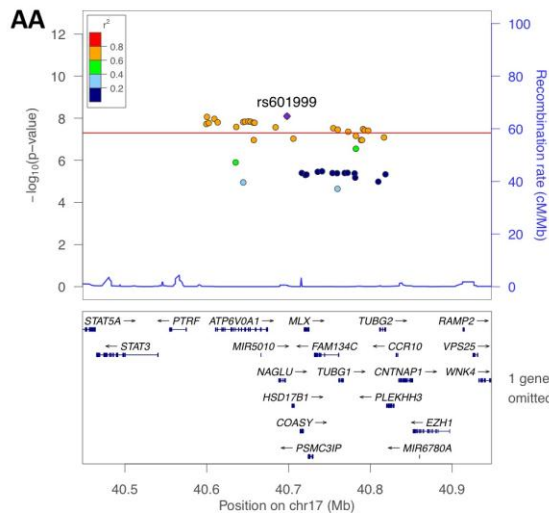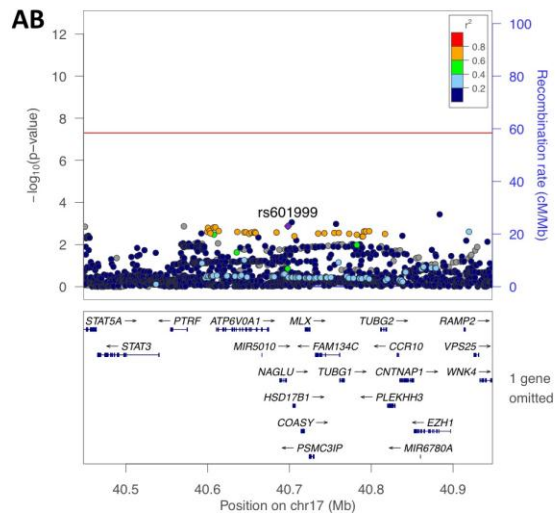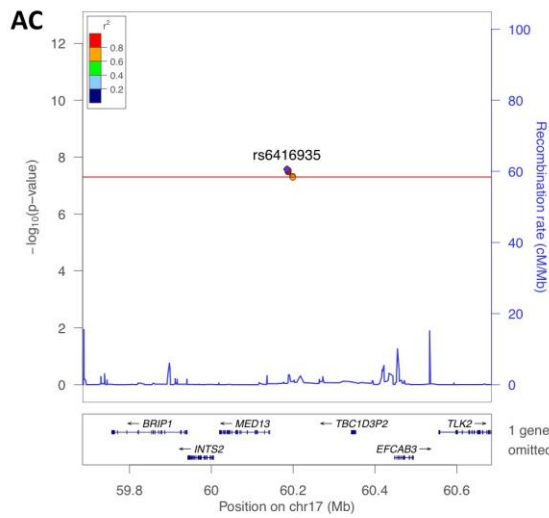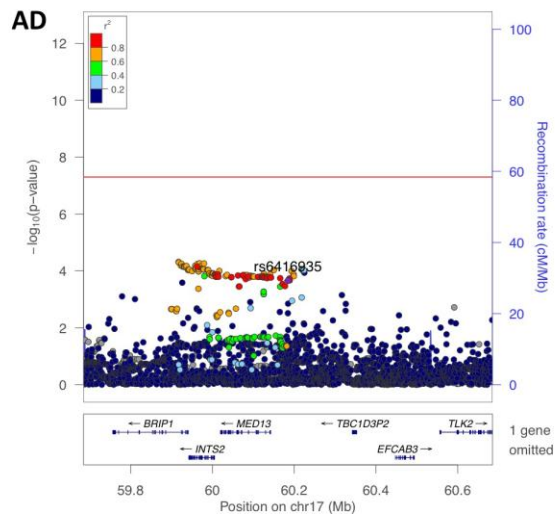

**Supplementary Figure 2. Regional association plots for loci with  $P < 5 \times 10^{-8}$  in the discovery phase meta-analysis. For the 15 novel loci, regional association plots are displayed for p-values in the meta-analysis (left column), as well as in the PDWBS data alone (right column). The index SNP for each region is labeled and plotted as a purple diamond. Colors for all other variants refer to the LD ( $r^2$ ) with the index SNP as measured in 1000 Genomes data. Grey refers to missing LD information for this SNP. Recombination rates for the regions are displayed in blue. For each association, all variants within 250kb of the index SNP are shown, with the exception of 4 regions (rs34043159, rs2694528, rs2296887, rs6416935) where variants within 500kb of the index SNP are shown. Grey arrows in (O-R) denote associations previously reported at non-genome-wide significant thresholds (rs1296028 and rs1536076). In two regions, the PDWBS GWAS indicate an alternate top signal. For rs34043159 (C-D), rs11679611 is the top association signal in the PDWBS data and for rs2296887 (U-V), rs9665587 is the top association signal in the PDWBS data. Plots were generated with Locus Zoom [9].**

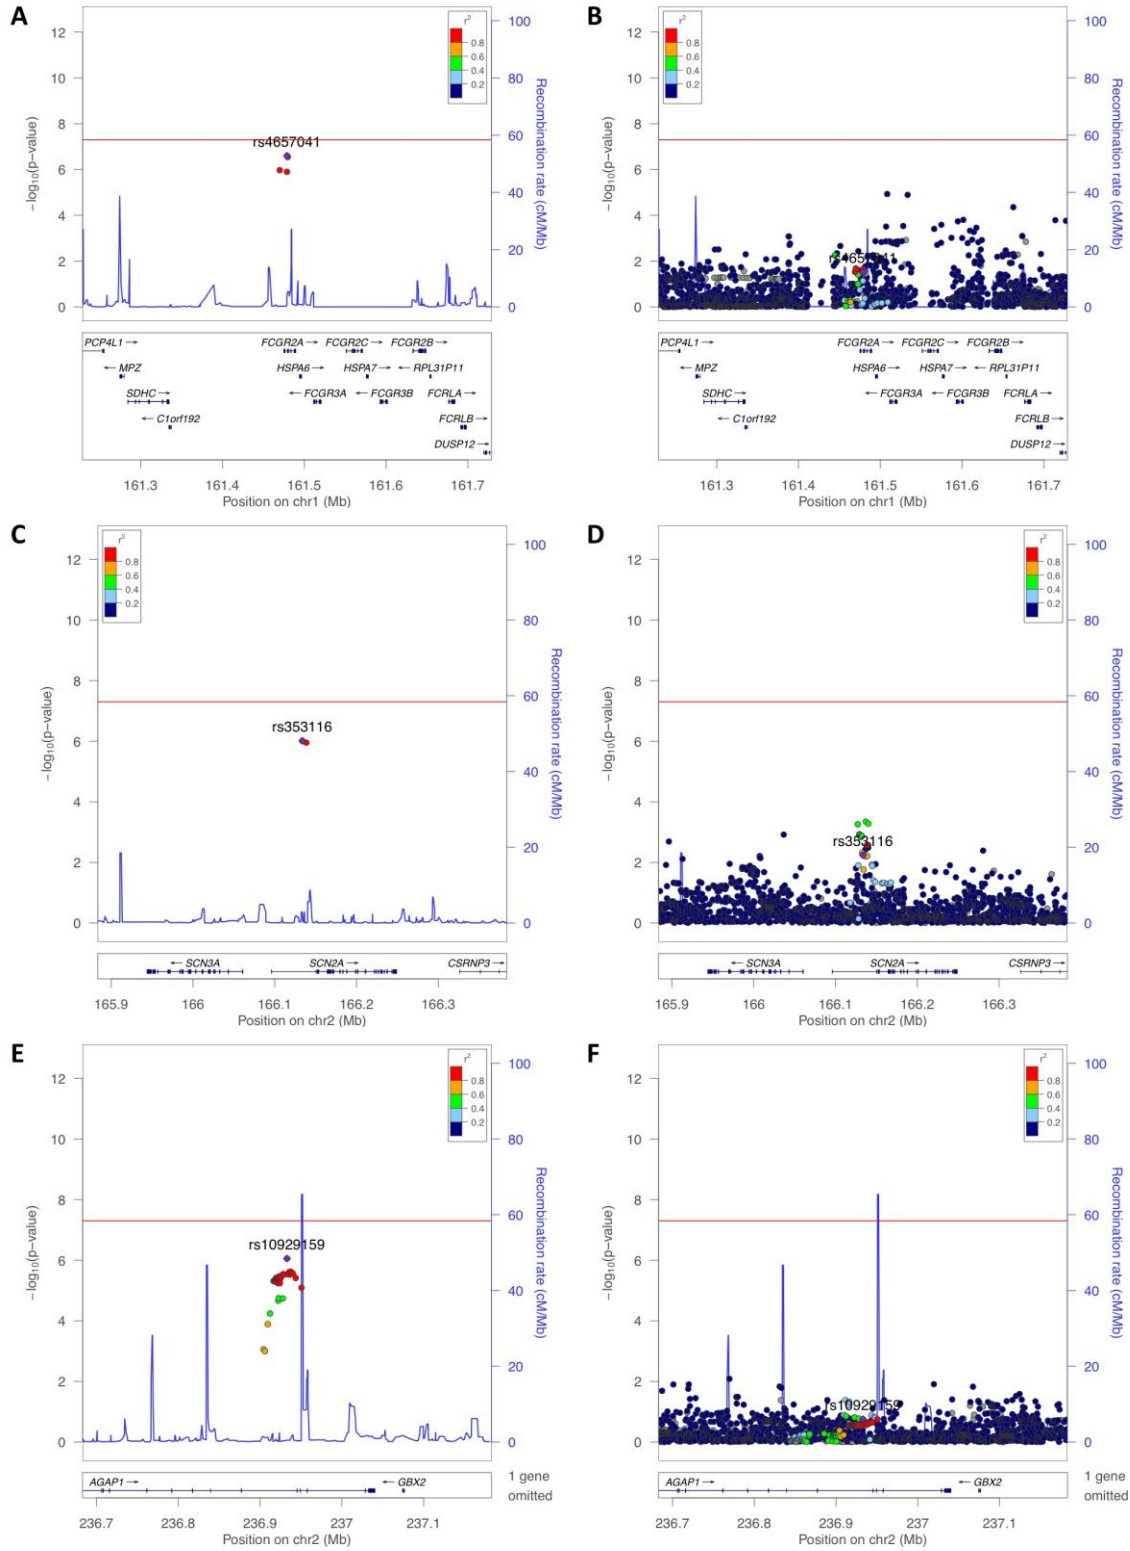

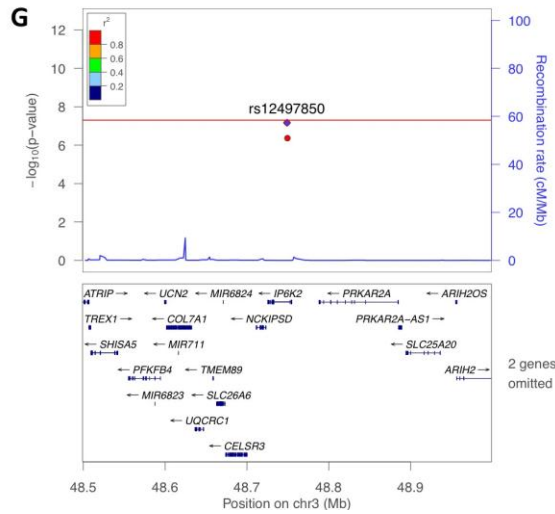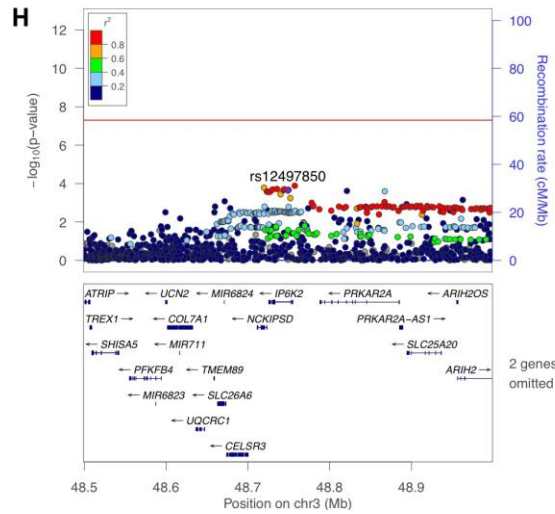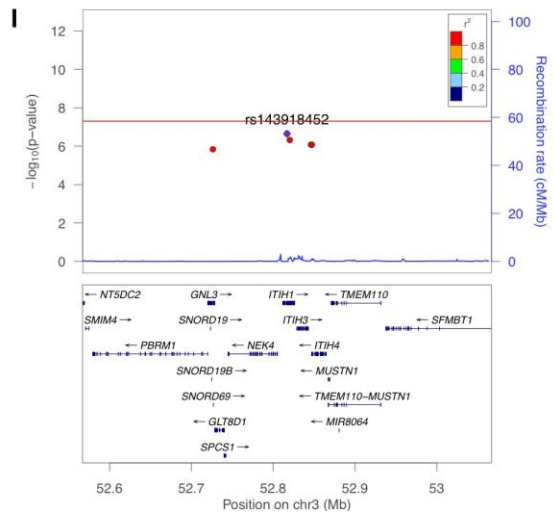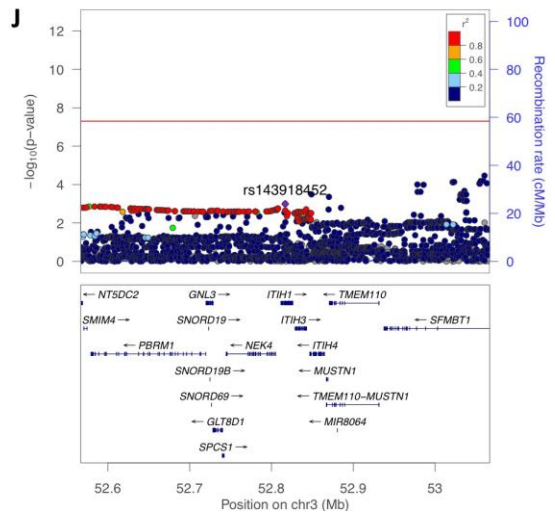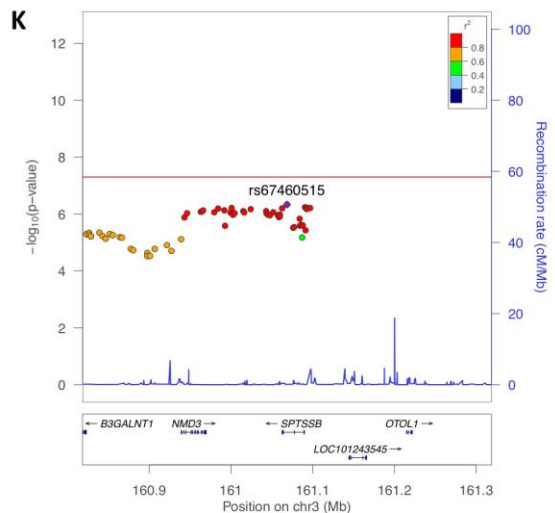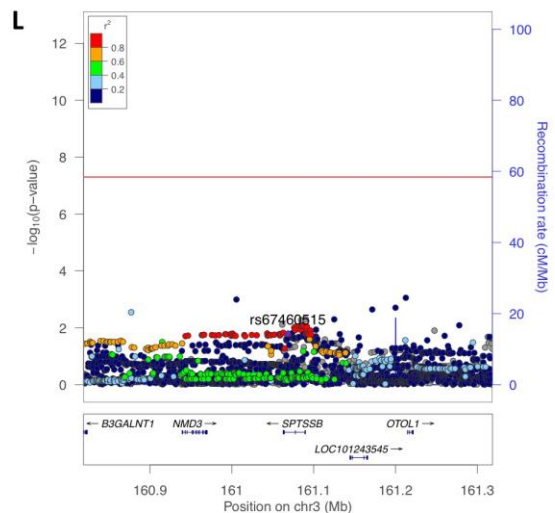

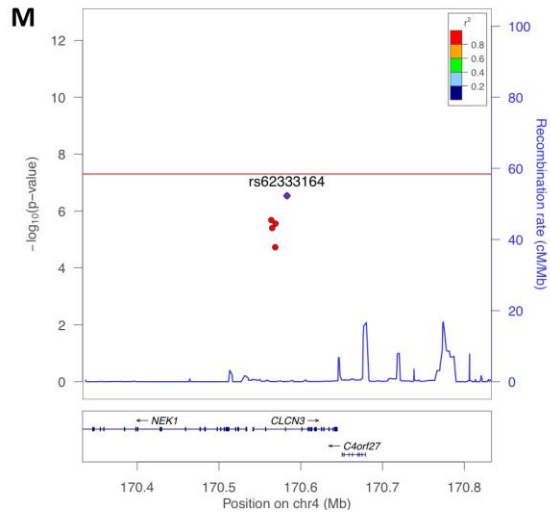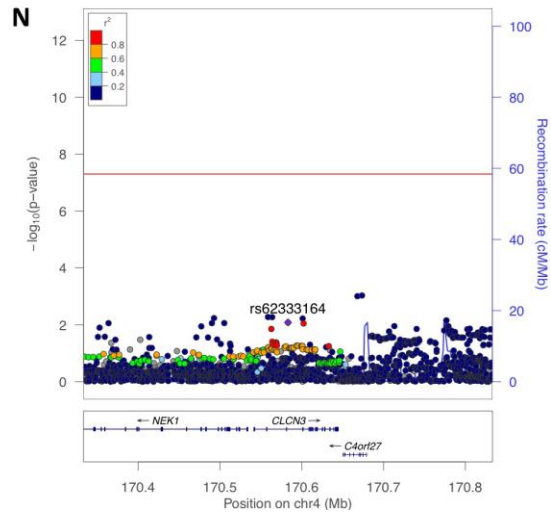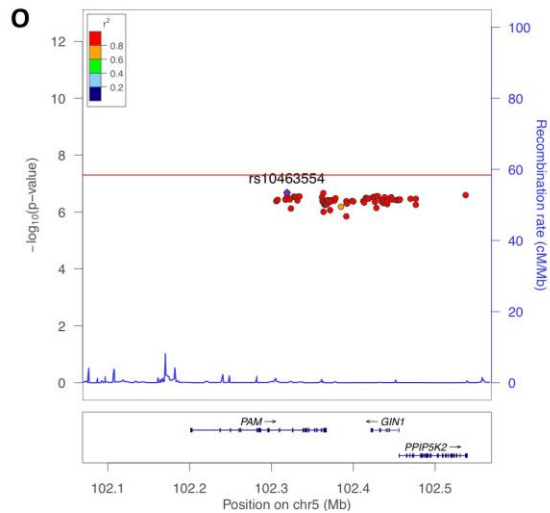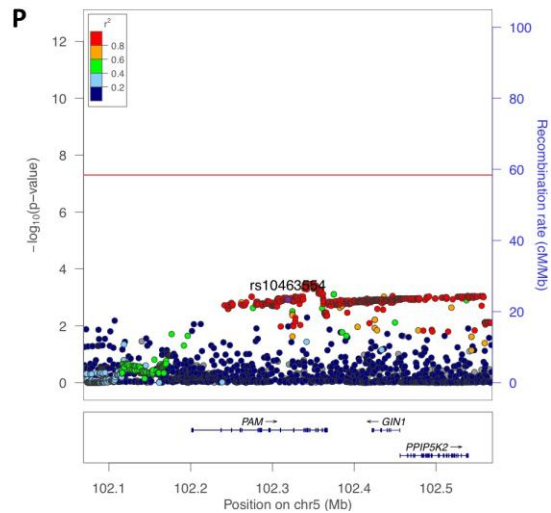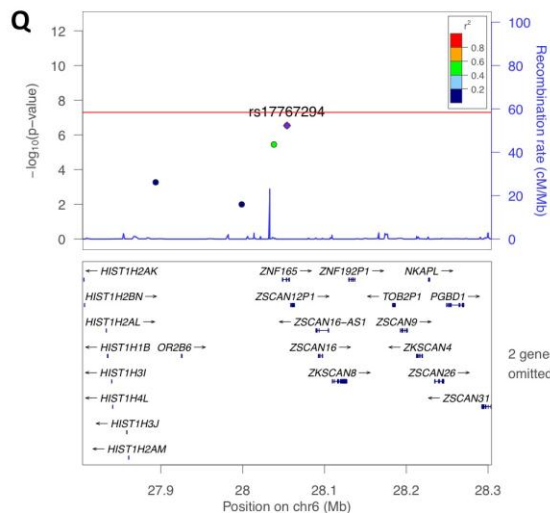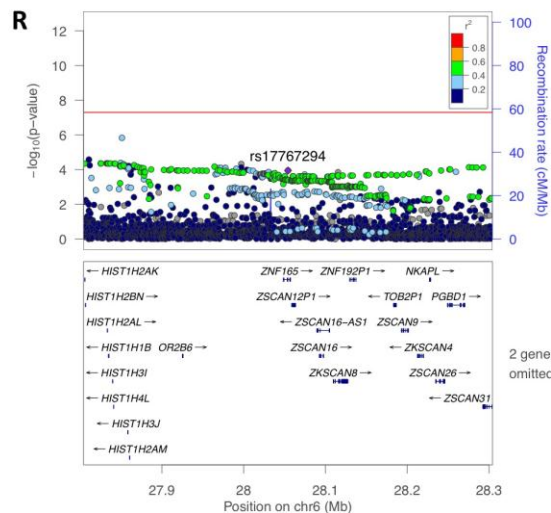



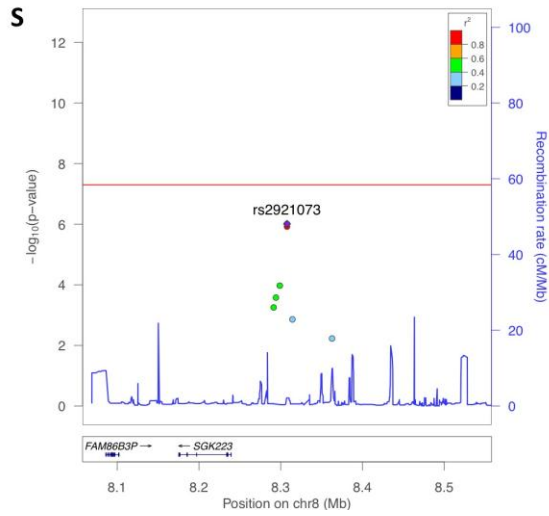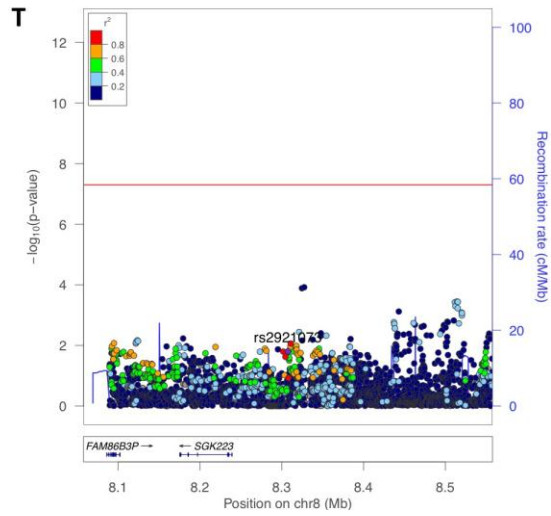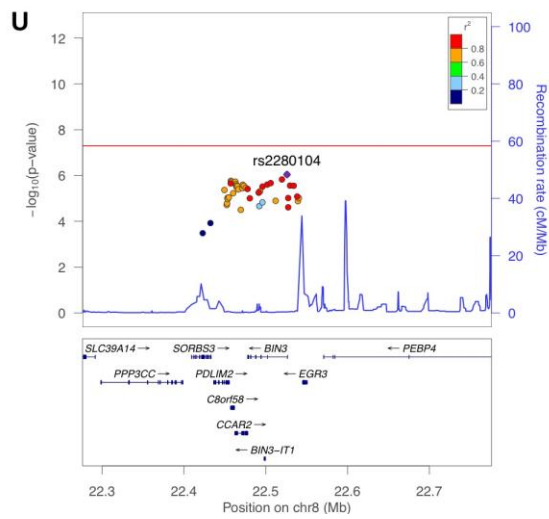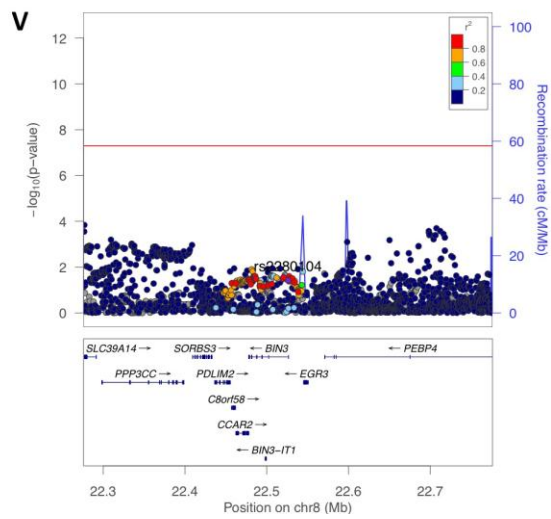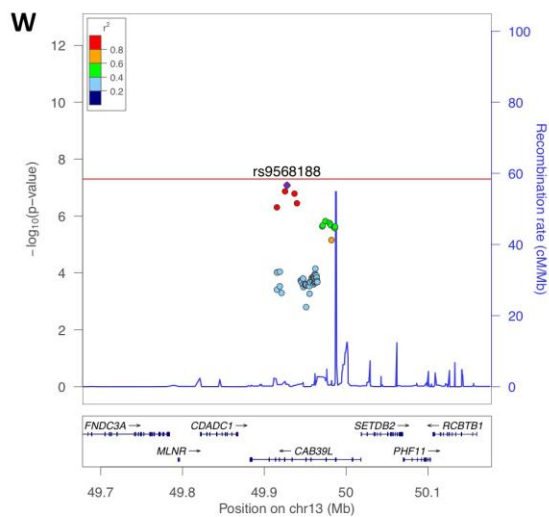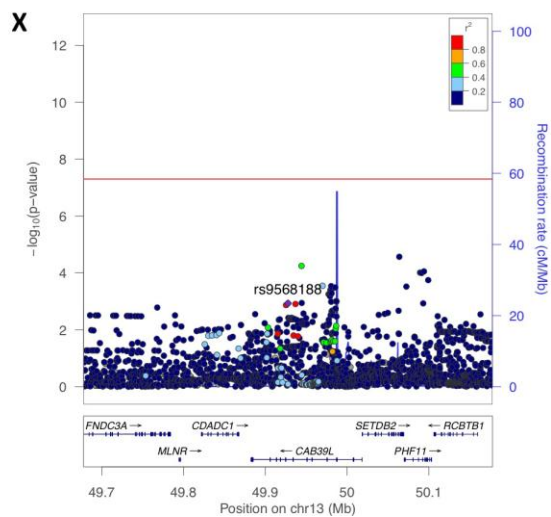

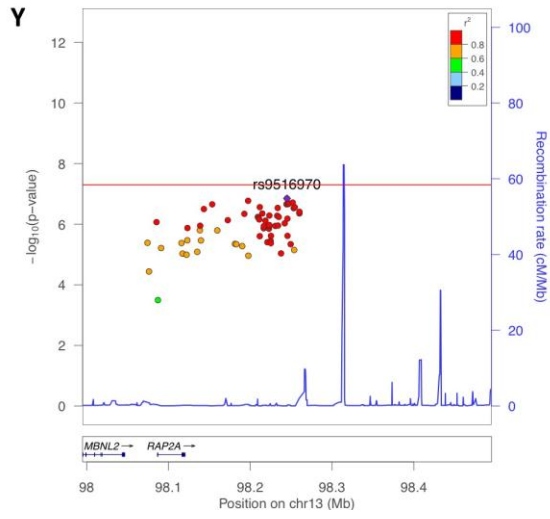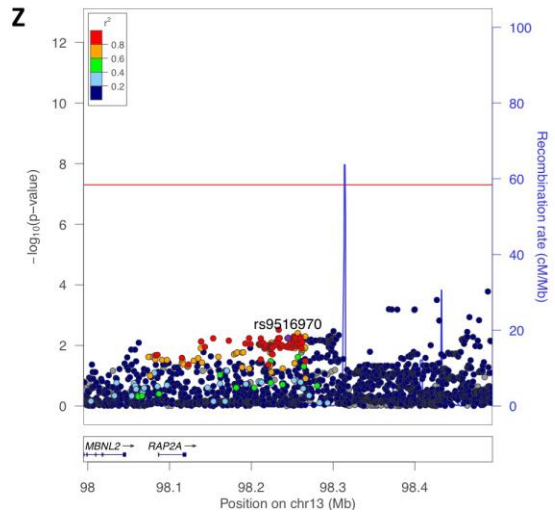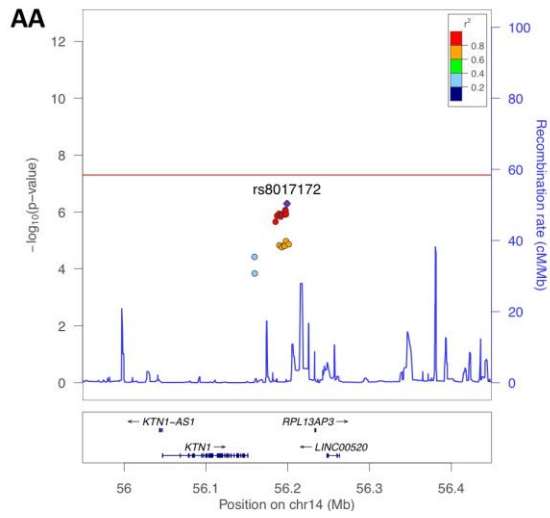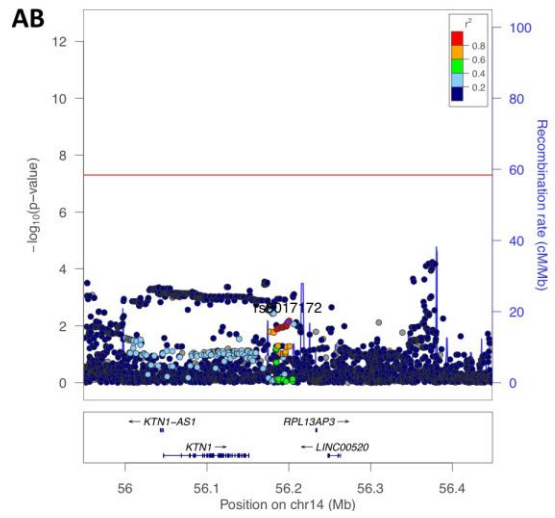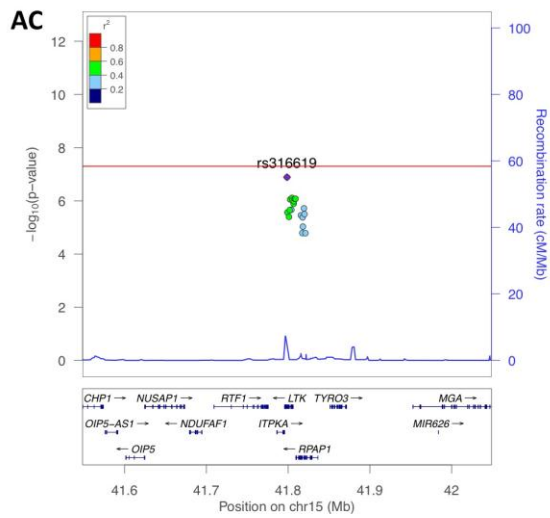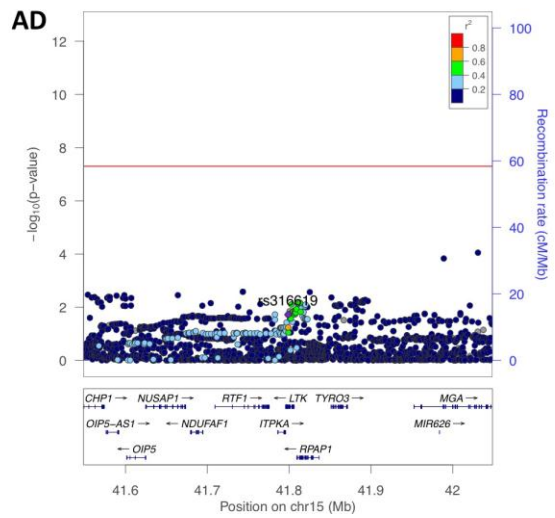

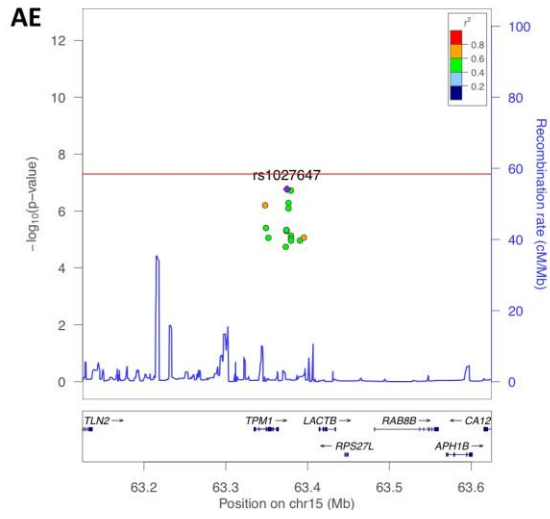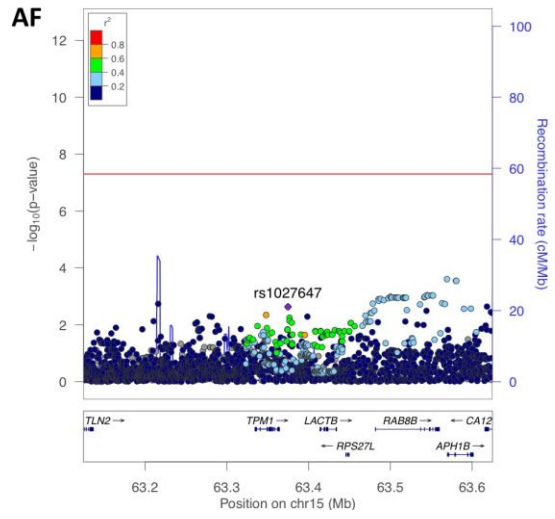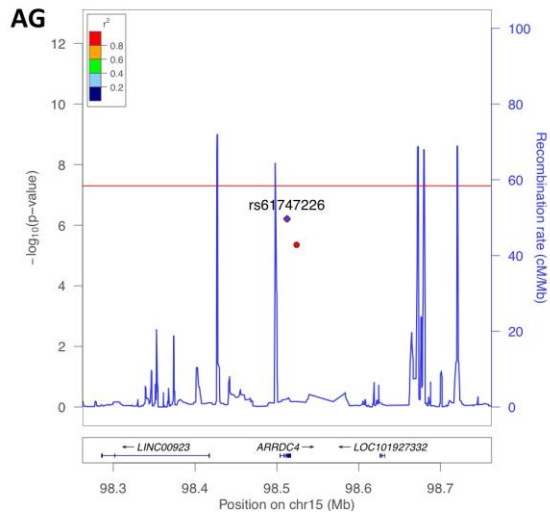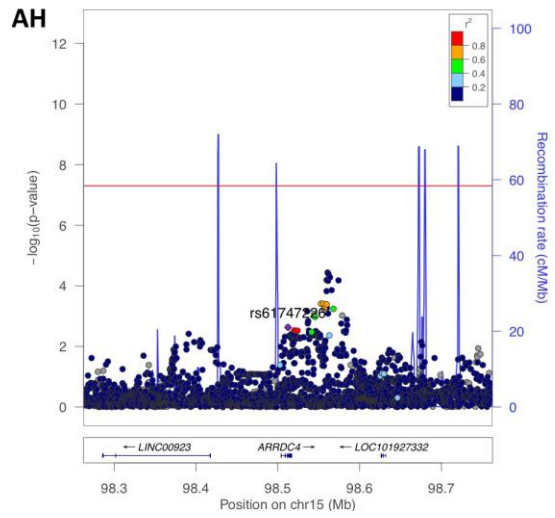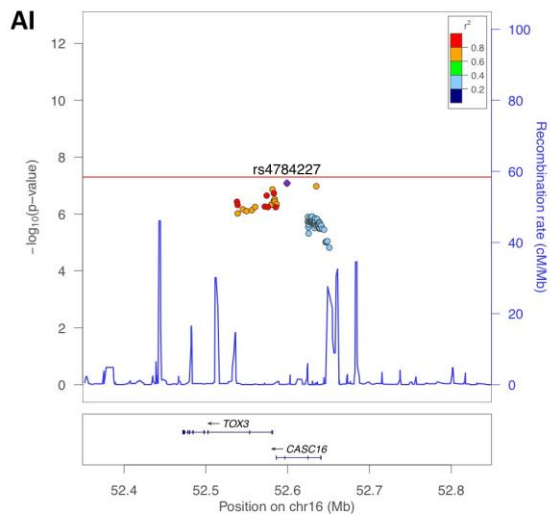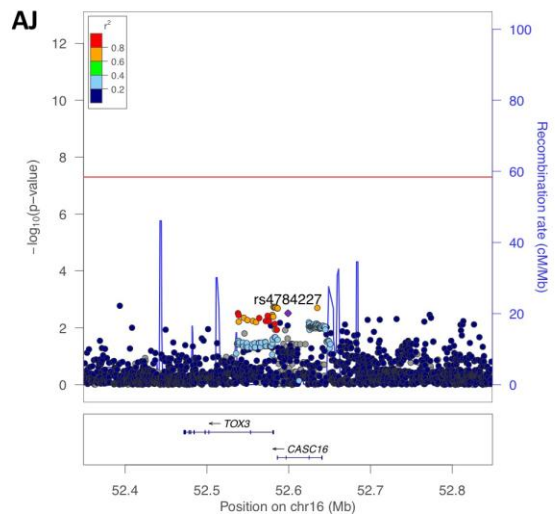

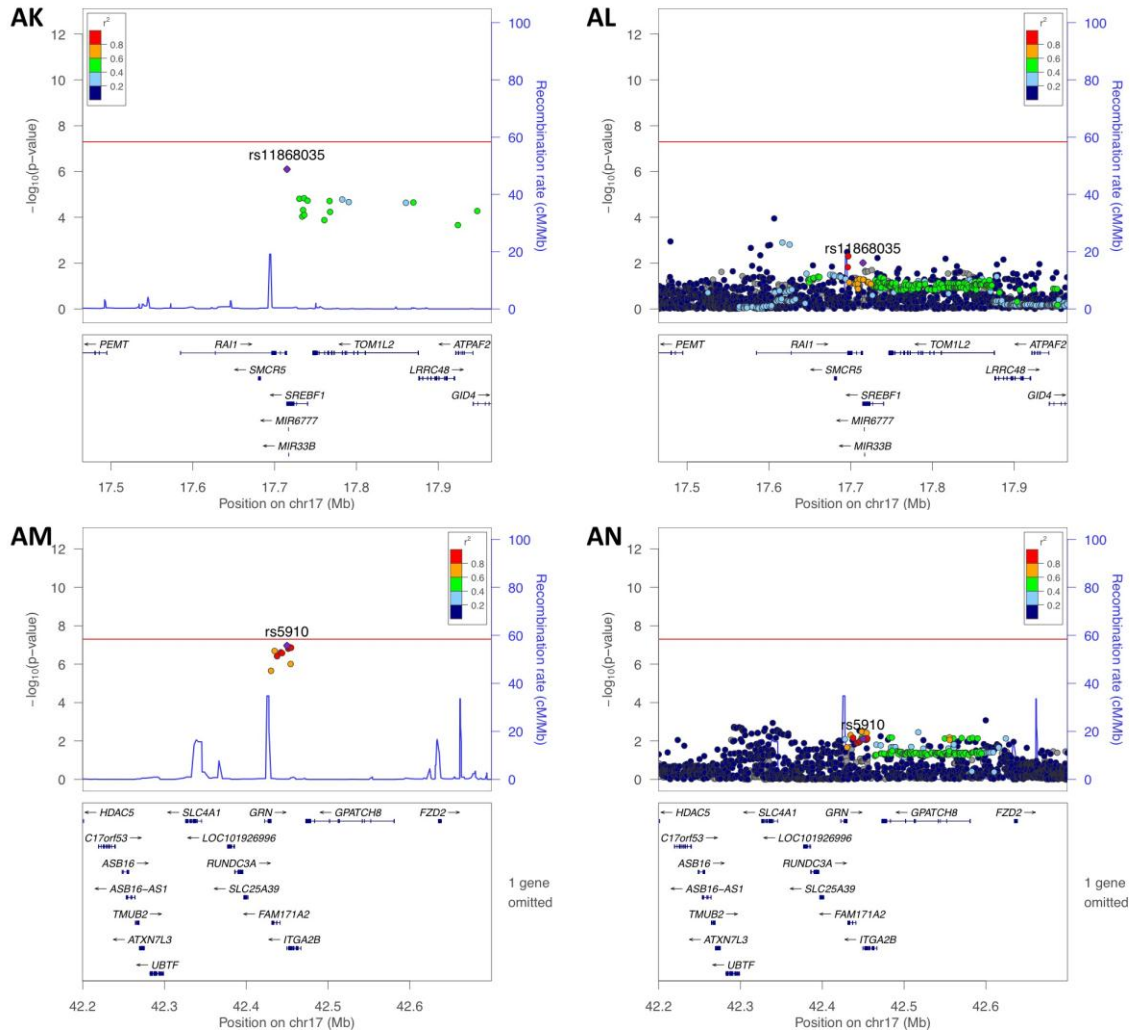

**Supplementary Figure 3. Regional association plots for loci with  $5 \times 10^{-8} < P < 1 \times 10^{-6}$  in the discovery phase meta-analysis.**

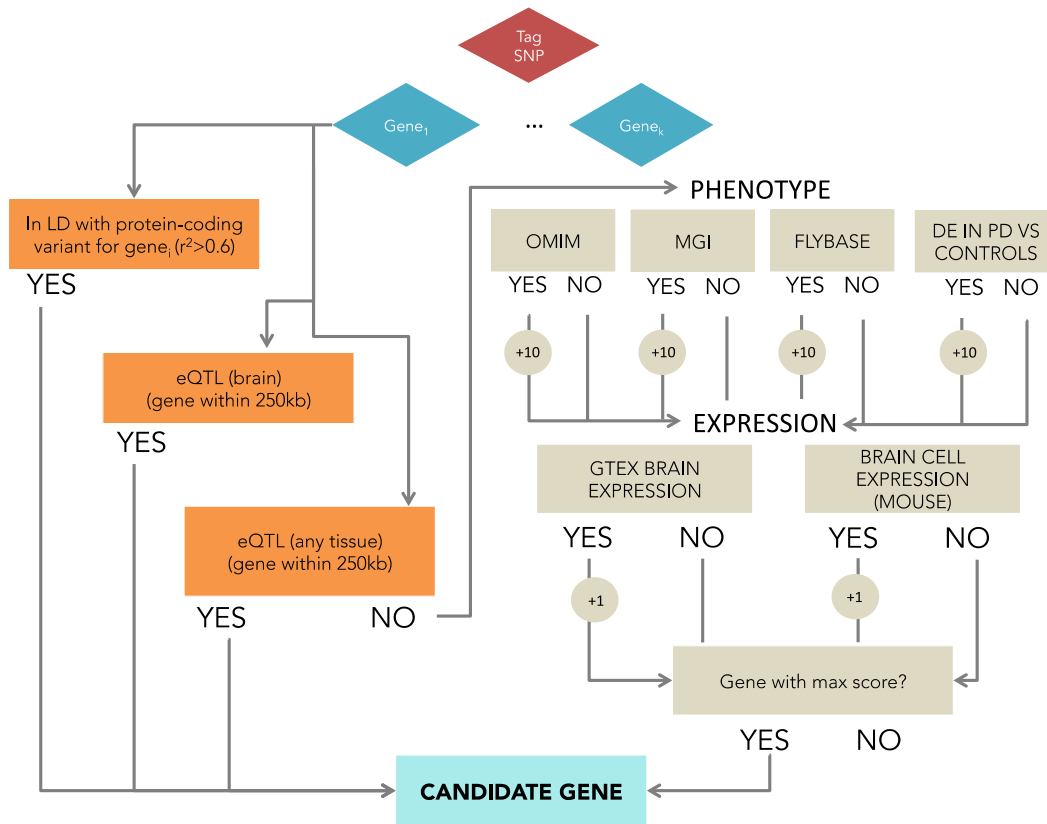

**Supplementary Figure 4. Candidate gene nomination pipeline.** A description of the candidate gene nomination procedure can be found in the Methods section in the main text.

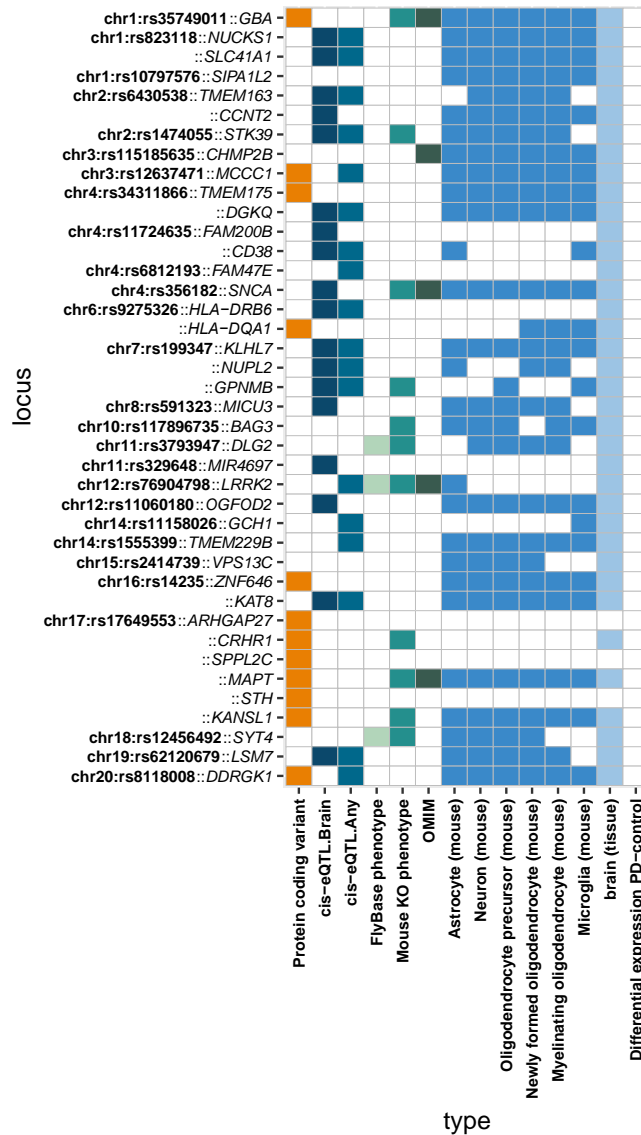

**Supplementary Figure 5. Expanded candidate gene evidence plot for previously reported loci.** Each locus is listed by chromosome followed by candidate genes. Loci with tied candidate genes are listed across several lines. Support for a gene with evidence from each category is indicated by a filled cell. Supporting evidence includes whether associated SNPs are cis-eQTLs; whether SNPs are in LD with protein-coding variants; whether genes have a neurological related phenotype in flies (“FlyBase”), mice (“Mouse KO”) or humans (“OMIM”); whether genes were expressed in any brain-specific cell type in mouse, or in human brain samples (“GTEx”); and, finally, whether genes were differentially expressed between PD patients and healthy controls.

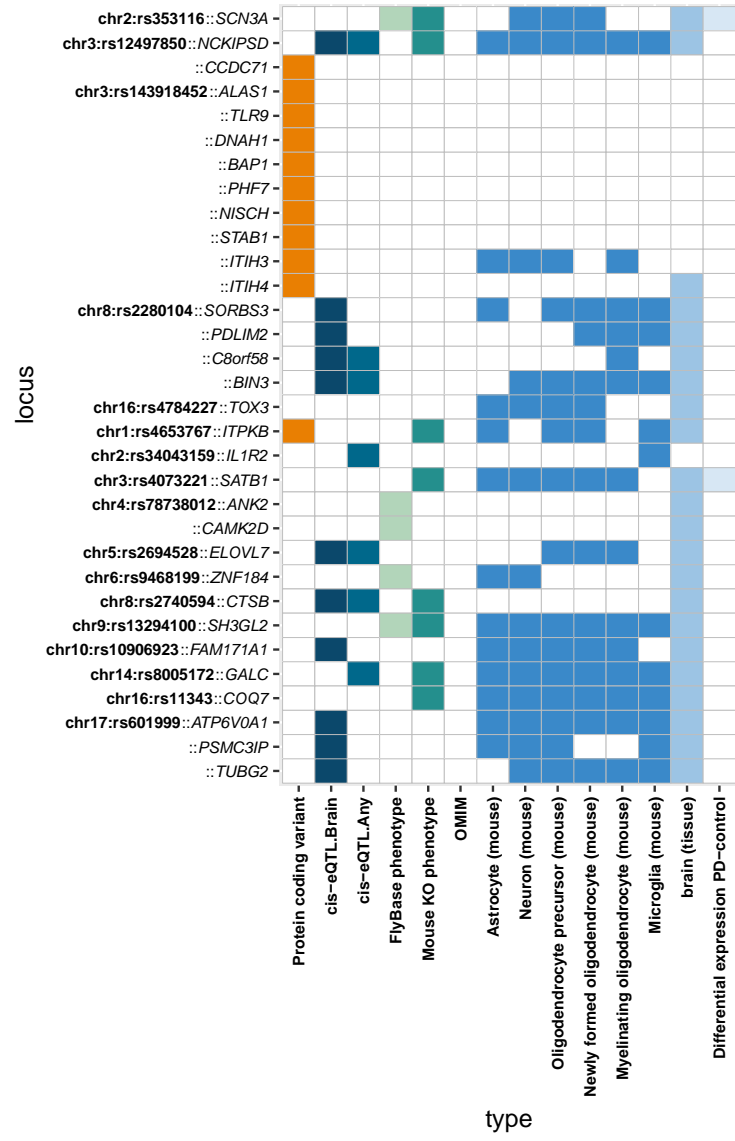

**Supplementary Figure 6. Expanded candidate gene evidence plot for new PD associations. Similar to Supplementary Figure 5, we present here a more detailed view of support for candidate genes of newly discovered PD associations.**

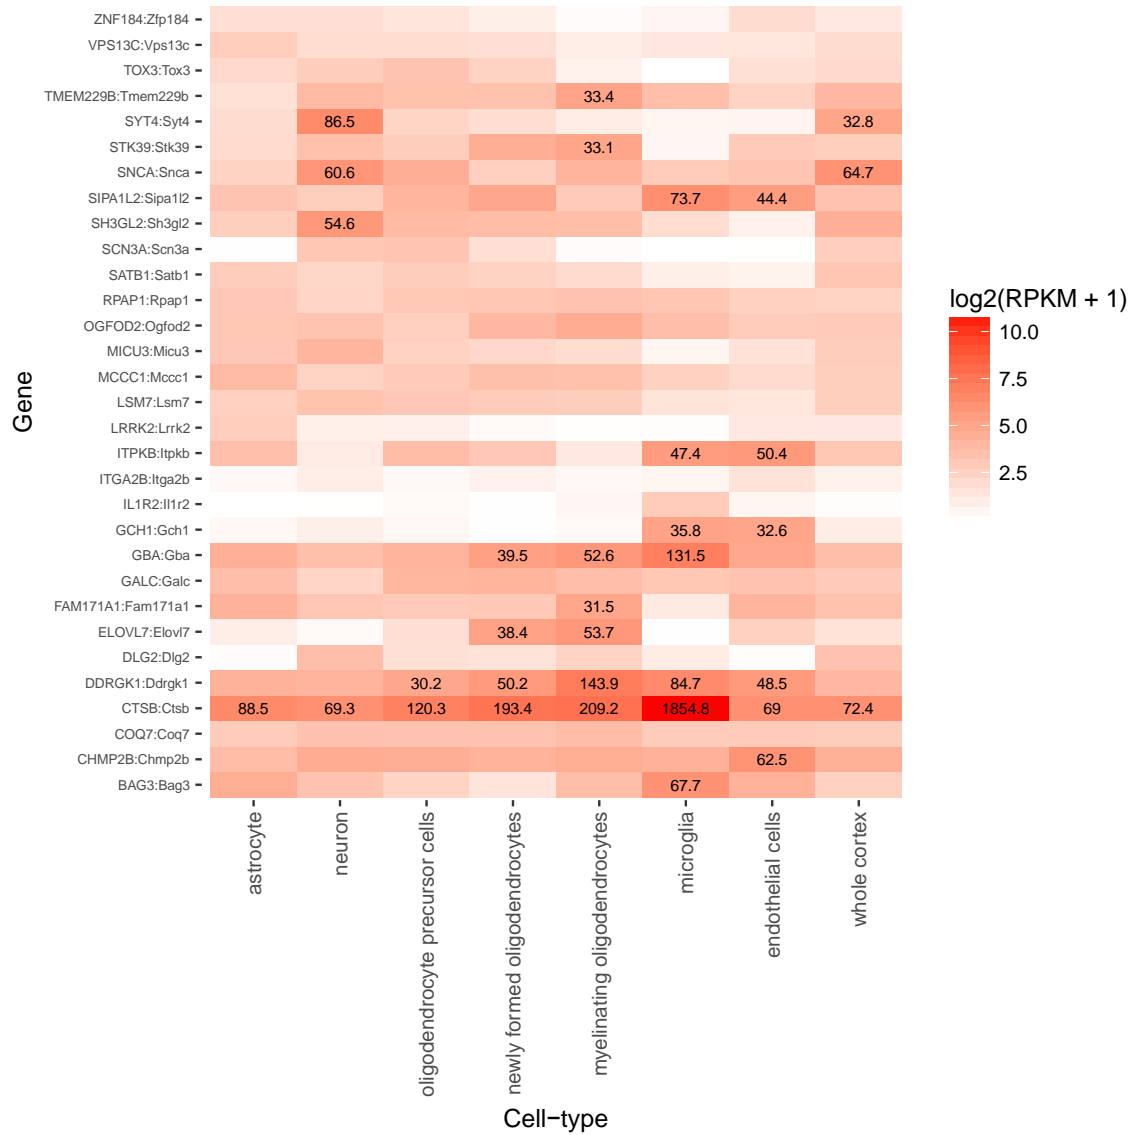

**Supplementary Figure 7. Mouse brain cell-type expression of PD candidate genes. For PD candidate genes, expression of the mouse homolog (if available) is plotted in specific mouse brain cells, as well as the whole cortex. Colors represent the  $\log_2(\text{RPKM}+1)$  of the gene, while the actual RPKM values are displayed for genes with expression >30 RPKMs. No enrichment of PD candidate genes for expression in a specific cell-type is observed.**



## SUPPLEMENTARY TABLES

**Supplementary Table 1. Enrichment statistics for PD heritability across 24 annotations. Data are provided in the corresponding file.**

| Cell-type          | Proportion SNPs | Proportion $h^2$ (std. error) | Enrichment (std. error) | Enrichment P-value     |
|--------------------|-----------------|-------------------------------|-------------------------|------------------------|
| Adrenal / Pancreas | 0.094           | 0.535<br>(0.117)              | 5.716 (1.253)           | $4.370 \times 10^{-5}$ |
| Cardiovascular     | 0.111           | 0.382<br>(0.140)              | 3.435 (1.262)           | 0.036                  |
| CNS                | 0.149           | 0.559<br>(0.111)              | 3.757 (0.746)           | 0.001                  |
| Connective Bone    | 0.115           | 0.333<br>(0.119)              | 2.897 (1.036)           | 0.044                  |
| GI                 | 0.168           | 0.323<br>(0.140)              | 1.925 (0.837)           | 0.251                  |
| Immune             | 0.233           | 0.457<br>(0.146)              | 1.960 (0.624)           | 0.110                  |
| Kidney             | 0.043           | 0.142<br>(0.081)              | 3.332 (1.909)           | 0.198                  |
| Liver              | 0.072           | 0.267<br>(0.111)              | 3.704 (1.533)           | 0.068                  |
| Other              | 0.203           | 0.523<br>(0.150)              | 2.582 (0.738)           | 0.033                  |
| SkeletalMuscle     | 0.104           | 0.271<br>(0.126)              | 2.615 (1.212)           | 0.187                  |

**Supplementary Table 2. Enrichment statistics for PD heritability across 10 cell-type groups.**

| Significance threshold | Observed # SNPs | Expected # SNPs | P-value                |
|------------------------|-----------------|-----------------|------------------------|
| 0.1                    | 157             | 45              | $7.05 \times 10^{-19}$ |
| 0.05                   | 128             | 22              | $5.68 \times 10^{-21}$ |
| 0.001                  | 17              | 0               | $8.93 \times 10^{-5}$  |
| $1.00 \times 10^{-6}$  | 1               | 0               | 1                      |

**Supplementary Table 3. Enrichment of PDGene associations in PDWBS.** Within the 9830 SNPs analyzed in the meta-analysis, the number of SNPs observed at various significance thresholds in the PDWBS GWAS is more than expected by chance alone (with the exception of the  $1 \times 10^{-6}$  threshold). After removing SNPs within regions previously associated with PD, the number of SNPs observed at each significance threshold in the PDWBS study was compared to the expected number of SNPs under the null hypothesis of no association (uniform distribution of p-values). P-values are calculated from a chi-squared test.

**Supplementary Table 4. Candidate PD associations with  $P < 1 \times 10^{-6}$  in the discovery meta-analysis. Data are available in the corresponding file.**

**Supplementary Table 5. NeuroX and joint meta-analysis association statistics for loci with  $P < 1 \times 10^{-6}$  in the discovery meta-analysis. Grayed out rows represent weaker proxies that were not included in the main manuscript. No suitable proxies were available for rs62333164 and rs4657041. (\*) denotes that publicly available data from PDGene for this SNP includes overlapping NeuroX data. Data are available in the corresponding file.**

**Supplementary Table 6. Variants with regulomeDB scores > 3 that are in LD with novel PD-associated index SNPs. Data are available in the corresponding file.**

| CHR | BP        | Condition SNP | Candidate gene           | Most significant SNP after conditioning | P <sub>original</sub>  | P <sub>condition</sub> |
|-----|-----------|---------------|--------------------------|-----------------------------------------|------------------------|------------------------|
| 1   | 205723572 | rs823118      | <i>NUCKS1,SLC41A1</i>    | rs11557080                              | 1.23x10 <sup>-7</sup>  | 3.99x10 <sup>-4</sup>  |
| 4   | 951947    | rs34311866    | <i>TMEM175,DGKQ</i>      | rs34884217*                             | 1.38x10 <sup>-6</sup>  | 3.7x10 <sup>-5</sup>   |
| 4   | 15737101  | rs11724635    | <i>FAM200B,CD38</i>      | rs7674301                               | 0.152                  | 3.75x10 <sup>-7</sup>  |
| 4   | 77198986  | rs6812193     | <i>FAM47E</i>            | rs4859430*                              | 3.60x10 <sup>-4</sup>  | 5.31x10 <sup>-9</sup>  |
| 4   | 90626111  | rs356182      | <i>SNCA</i>              | rs7681154*                              | 0.171                  | 2.38x10 <sup>-13</sup> |
| 6   | 32666660  | rs9275326     | <i>HLA-DRB6,HLA-DQA1</i> | rs532965                                | 7.71x10 <sup>-7</sup>  | 1.11x10 <sup>-4</sup>  |
| 9   | 17579690  | rs13294100    | <i>SH3GL2</i>            | rs4961588                               | 3.88x10 <sup>-5</sup>  | 2.27x10 <sup>-4</sup>  |
| 12  | 40614434  | rs76904798    | <i>LRRK2</i>             | rs28370830                              | 1.14x10 <sup>-14</sup> | 4.08x10 <sup>-15</sup> |
| 12  | 123303586 | rs11060180    | <i>OGFOD2</i>            | rs10847864                              | 3.31x10 <sup>-13</sup> | 7.12x10 <sup>-5</sup>  |
| 16  | 31121793  | rs14235       | <i>ZNF646,KAT8</i>       | rs4889685                               | 4.22x10 <sup>-5</sup>  | 4.02x10 <sup>-4</sup>  |

**Supplementary Table 7. Loci with residual associations after conditional analysis. Loci with residual associations ( $P_{\text{condition}} < 1 \times 10^{-3}$ ) after conditional analysis in the PDWBS data are listed. The most significant SNP in the locus after conditioning is listed along with its original p-value and its p-value after conditioning on the "Condition SNP." (\*) denotes the SNP listed is the independent variant reported in the Nalls *et al.* study.**

| Index       | Coding variant | r <sup>2</sup> | Gene            | Type                                     | Transcript ID   | Change           |
|-------------|----------------|----------------|-----------------|------------------------------------------|-----------------|------------------|
| rs9275326   | rs9272785      | 0.61           | <i>HLA-DQA1</i> | missense                                 | ENST00000343139 | p.Ala210Thr      |
| rs8118008   | rs2295547      | 0.66           | <i>DDRKG1</i>   | missense                                 | ENST00000380201 | p.Phe298Leu      |
| rs35749011  | rs2230288      | 0.89           | <i>GBA</i>      | missense                                 | ENST00000327247 | p.Glu365Lys      |
| rs34311866  | rs34311866     | 1.00           | <i>TMEM175</i>  | missense                                 | ENST00000264771 | p.Met393Thr      |
| rs17649553  | rs62063857     | 0.99           | <i>STH</i>      | missense                                 | ENST00000537309 | p.Gln7Arg        |
| rs17649553  | rs62621252     | 0.99           | <i>SPPL2C</i>   | missense                                 | ENST00000329196 | p.Ser224Pro      |
| rs17649553  | rs63750417     | 0.99           | <i>MAPT</i>     | missense                                 | ENST00000344290 | p.Pro202Leu      |
| rs17649553  | rs34579536     | 0.99           | <i>KANSL1</i>   | missense                                 | ENST00000262419 | p.Ile1085Thr     |
| rs17649553  | rs16940681     | 0.99           | <i>CRHR1</i>    | missense                                 | ENST00000339069 | p.Glu280Gln      |
| rs17649553  | rs12949256     | 0.62           | <i>ARHGAP27</i> | missense                                 | ENST00000428638 | p.Ala117Thr      |
| rs14235     | rs749670       | 0.89           | <i>ZNF646</i>   | missense                                 | ENST00000394979 | p.Glu327Gly      |
| rs12637471  | rs2270968      | 0.69           | <i>MCCC1</i>    | missense                                 | ENST00000492597 | p.His355Pro      |
| rs4653767   | rs147889095    | 0.85           | <i>ITPKB</i>    | disruptive inframe deletion              | ENST00000429204 | p.Ser93_Ser95del |
| rs62333164  | rs34755939     | 0.62           | <i>CLCN3</i>    | missense                                 | ENST00000504131 | p.Ala15Gly       |
| rs61747226  | rs61747226     | 1.00           | <i>ARRDC4</i>   | missense                                 | ENST00000268042 | p.Thr235Met      |
| rs5910      | rs5911         | 0.98           | <i>ITGA2B</i>   | missense                                 | ENST00000262407 | p.Ile874Ser      |
| rs4657041   | rs1801274      | 1.00           | <i>FCGR2A</i>   | missense                                 | ENST00000271450 | p.His167Arg      |
| rs143918452 | rs5743845      | 1.00           | <i>TLR9</i>     | missense                                 | ENST00000360658 | p.Arg863Gln      |
| rs143918452 | rs150311081    | 1.00           | <i>STAB1</i>    | missense                                 | ENST00000321725 | p.Arg1019His     |
| rs143918452 | rs201539522    | 1.00           | <i>PHF7</i>     | splice acceptor variant & intron variant | ENST00000327906 | NA               |
| rs143918452 | rs61736838     | 1.00           | <i>NISCH</i>    | missense                                 | ENST00000345716 | p.Ala1028Val     |
| rs143918452 | rs151083454    | 1.00           | <i>ITIH4</i>    | missense                                 | ENST00000266041 | p.Gly893Ser      |
| rs143918452 | rs148156289    | 1.00           | <i>ITIH3</i>    | missense                                 | ENST00000449956 | p.Met757Ile      |
| rs143918452 | rs61729450     | 1.00           | <i>DNAH1</i>    | missense                                 | ENST00000420323 | p.Ile190Thr      |
| rs143918452 | rs146661777    | 1.00           | <i>BAP1</i>     | missense                                 | ENST00000478368 | p.Asp145His      |
| rs143918452 | rs35338461     | 1.00           | <i>ALAS1</i>    | missense                                 | ENST00000394965 | p.Arg13Gln       |
| rs12497850  | rs4955419      | 0.71           | <i>CCDC71</i>   | missense                                 | ENST00000321895 | p.Gln317Leu      |
| rs11868035  | rs11649804     | 0.94           | <i>RAI1</i>     | missense                                 | ENST00000353383 | p.Pro165Thr      |
| rs10463554  | rs34813        | 0.92           | <i>GIN1</i>     | missense                                 | ENST00000399004 | p.Thr239Met      |

**Supplementary Table 8. Functional variants for PD associated loci. Functional variants are listed for PD associated loci, in addition to the r<sup>2</sup> between the index variant and the coding variant (measured in 1000 Genomes) the Ensembl transcript ID, as well as the corresponding amino acid change (if applicable) is noted. If the variant impacted several transcripts, only the longest transcript is listed. If the index variant is in LD with multiple coding variants for the same gene only the one with the largest r<sup>2</sup> is listed.**



**Supplementary Table 9. Cis-eQTLs for PD associated loci. For PD associated regions with significant cis-eQTLs (as displayed in Figure 3), the brain and non-brain tissue with the most significant p-value is listed for each PD loci. "Risk expression" considers the direction of expression the risk allele is associated with. Data are available in the corresponding file.**

**Supplementary Table 10. Genes within 250kb of PD associated loci with evidence of co-expression and/or protein-protein interactions. Data are available in the corresponding file.**

| Category             | P-value               | Obs. | Exp. | Candidate genes in these gene sets |
|----------------------|-----------------------|------|------|------------------------------------|
| <b>Lysosome</b>      |                       |      |      |                                    |
| Previously reported  | 1.33x10 <sup>-3</sup> | 2    | 0.22 | <i>GBA , TMEM175</i>               |
| Novel associations   | 3.64x10 <sup>-5</sup> | 3    | 0.19 | <i>CTSB, GALC, ATP6V0A1</i>        |
| All                  | 3.35x10 <sup>-6</sup> | 5    | 0.40 |                                    |
| <b>Autophagy</b>     |                       |      |      |                                    |
| Previously reported  | 1.09x10 <sup>-3</sup> | 2    | 0.20 | <i>BAG3, KAT8</i>                  |
| Novel associations   | NA                    | 1    | 0.18 | <i>CTSB</i>                        |
| All                  | 5.71x10 <sup>-3</sup> | 3    | 0.38 |                                    |
| <b>Mitochondrial</b> |                       |      |      |                                    |
| Previously reported  | NA                    | 1    | 1.03 | <i>MCCC1</i>                       |
| Novel associations   | 0.058                 | 2    | 0.89 | <i>COQ7, ALAS1</i>                 |
| All                  | 0.13                  | 3    | 1.92 |                                    |

**Supplementary Table 11. Targeted enrichment analysis of PD associations. PD associations are enriched for genes in the lysosomal and autophagy pathways. P-values were not calculated for gene-sets with less than 2 observed genes. Expected number of genes (“Exp.”) is calculated as (#genes in the gene-set)/(# genes in the background set)\*(# genes associated with PD).**

**Supplementary Table 12. General gene-set enrichment analysis of PD associations. Data are available in the corresponding file.**

**Supplementary Table 13. All protein-coding genes within 250 kb of PD-associated loci used as input for STRING analysis. Data are available in the corresponding file.**

**Supplementary Table 14. Minimum p-values for the 42 genes in the lysosomal pathway for which SNPs tested in this meta-analysis were within 250kb. Data are available in the corresponding file.**

**Supplementary Table 15. Minimum p-values for 117 genes in the mitochondrial pathway for which SNPs tested in this meta-analysis were within 250kb of. Data are available in the corresponding file.**

**Supplementary Table 16. Minimum p-values for 25 genes in the autophagy pathway for which SNPs tested in this meta-analysis were within 250kb of. Data are available in the corresponding file.**



## REFERENCES

1. Skol AD, Scott LJ, Abecasis GR, Boehnke M. Joint analysis is more efficient than replication-based analysis for two-stage genome-wide association studies. *Nature genetics*. 2006;38(2):209-13. doi: 10.1038/ng1706. PubMed PMID: 16415888.
2. International Parkinson Disease Genomics C, Nalls MA, Plagnol V, Hernandez DG, Sharma M, Sheerin UM, et al. Imputation of sequence variants for identification of genetic risks for Parkinson's disease: a meta-analysis of genome-wide association studies. *Lancet*. 2011;377(9766):641-9. doi: 10.1016/S0140-6736(10)62345-8. PubMed PMID: 21292315; PubMed Central PMCID: PMC3696507.
3. Nalls MA, Pankratz N, Lill CM, Do CB, Hernandez DG, Saad M, et al. Large-scale meta-analysis of genome-wide association data identifies six new risk loci for Parkinson's disease. *Nature genetics*. 2014;46(9):989-93. doi: 10.1038/ng.3043. PubMed PMID: 25064009; PubMed Central PMCID: PMC4146673.
4. International Parkinson's Disease Genomics C, Wellcome Trust Case Control C. A two-stage meta-analysis identifies several new loci for Parkinson's disease. *PLoS genetics*. 2011;7(6):e1002142. doi: 10.1371/journal.pgen.1002142. PubMed PMID: 21738488; PubMed Central PMCID: PMC3128098.
5. Nalls MA, McLean CY, Rick J, Eberly S, Hutten SJ, Gwinn K, et al. Diagnosis of Parkinson's disease on the basis of clinical and genetic classification: a population-based modelling study. *Lancet Neurol*. 2015;14(10):1002-9. doi: 10.1016/S1474-4422(15)00178-7. PubMed PMID: 26271532; PubMed Central PMCID: PMC4575273.
6. DeLong ER, DeLong DM, Clarke-Pearson DL. Comparing the areas under two or more correlated receiver operating characteristic curves: a nonparametric approach. *Biometrics*. 1988;44(3):837-45. PubMed PMID: 3203132.
7. Love MI, Huber W, Anders S. Moderated estimation of fold change and dispersion for RNA-seq data with DESeq2. *Genome Biol*. 2014;15(12):550. doi: 10.1186/s13059-014-0550-8. PubMed PMID: 25516281; PubMed Central PMCID: PMC4302049.
8. Giambartolomei C, Vukcevic D, Schadt EE, Franke L, Hingorani AD, Wallace C, et al. Bayesian test for colocalisation between pairs of genetic association studies using summary statistics. *PLoS genetics*. 2014;10(5):e1004383. doi: 10.1371/journal.pgen.1004383. PubMed PMID: 24830394; PubMed Central PMCID: PMC4022491.
9. Pruim RJ, Welch RP, Sanna S, Teslovich TM, Chines PS, Gliedt TP, et al. LocusZoom: regional visualization of genome-wide association scan results. *Bioinformatics*. 2010;26(18):2336-7. doi: 10.1093/bioinformatics/btq419. PubMed PMID: 20634204; PubMed Central PMCID: PMC2935401.
